# Supplementary material for: A concise synthesis of (±)-7-O-galloyltricetiflavan
Source: Royal Society of Chemistry journal article supplement (doi:10.1039/c8ra01606b), 2018-01-01

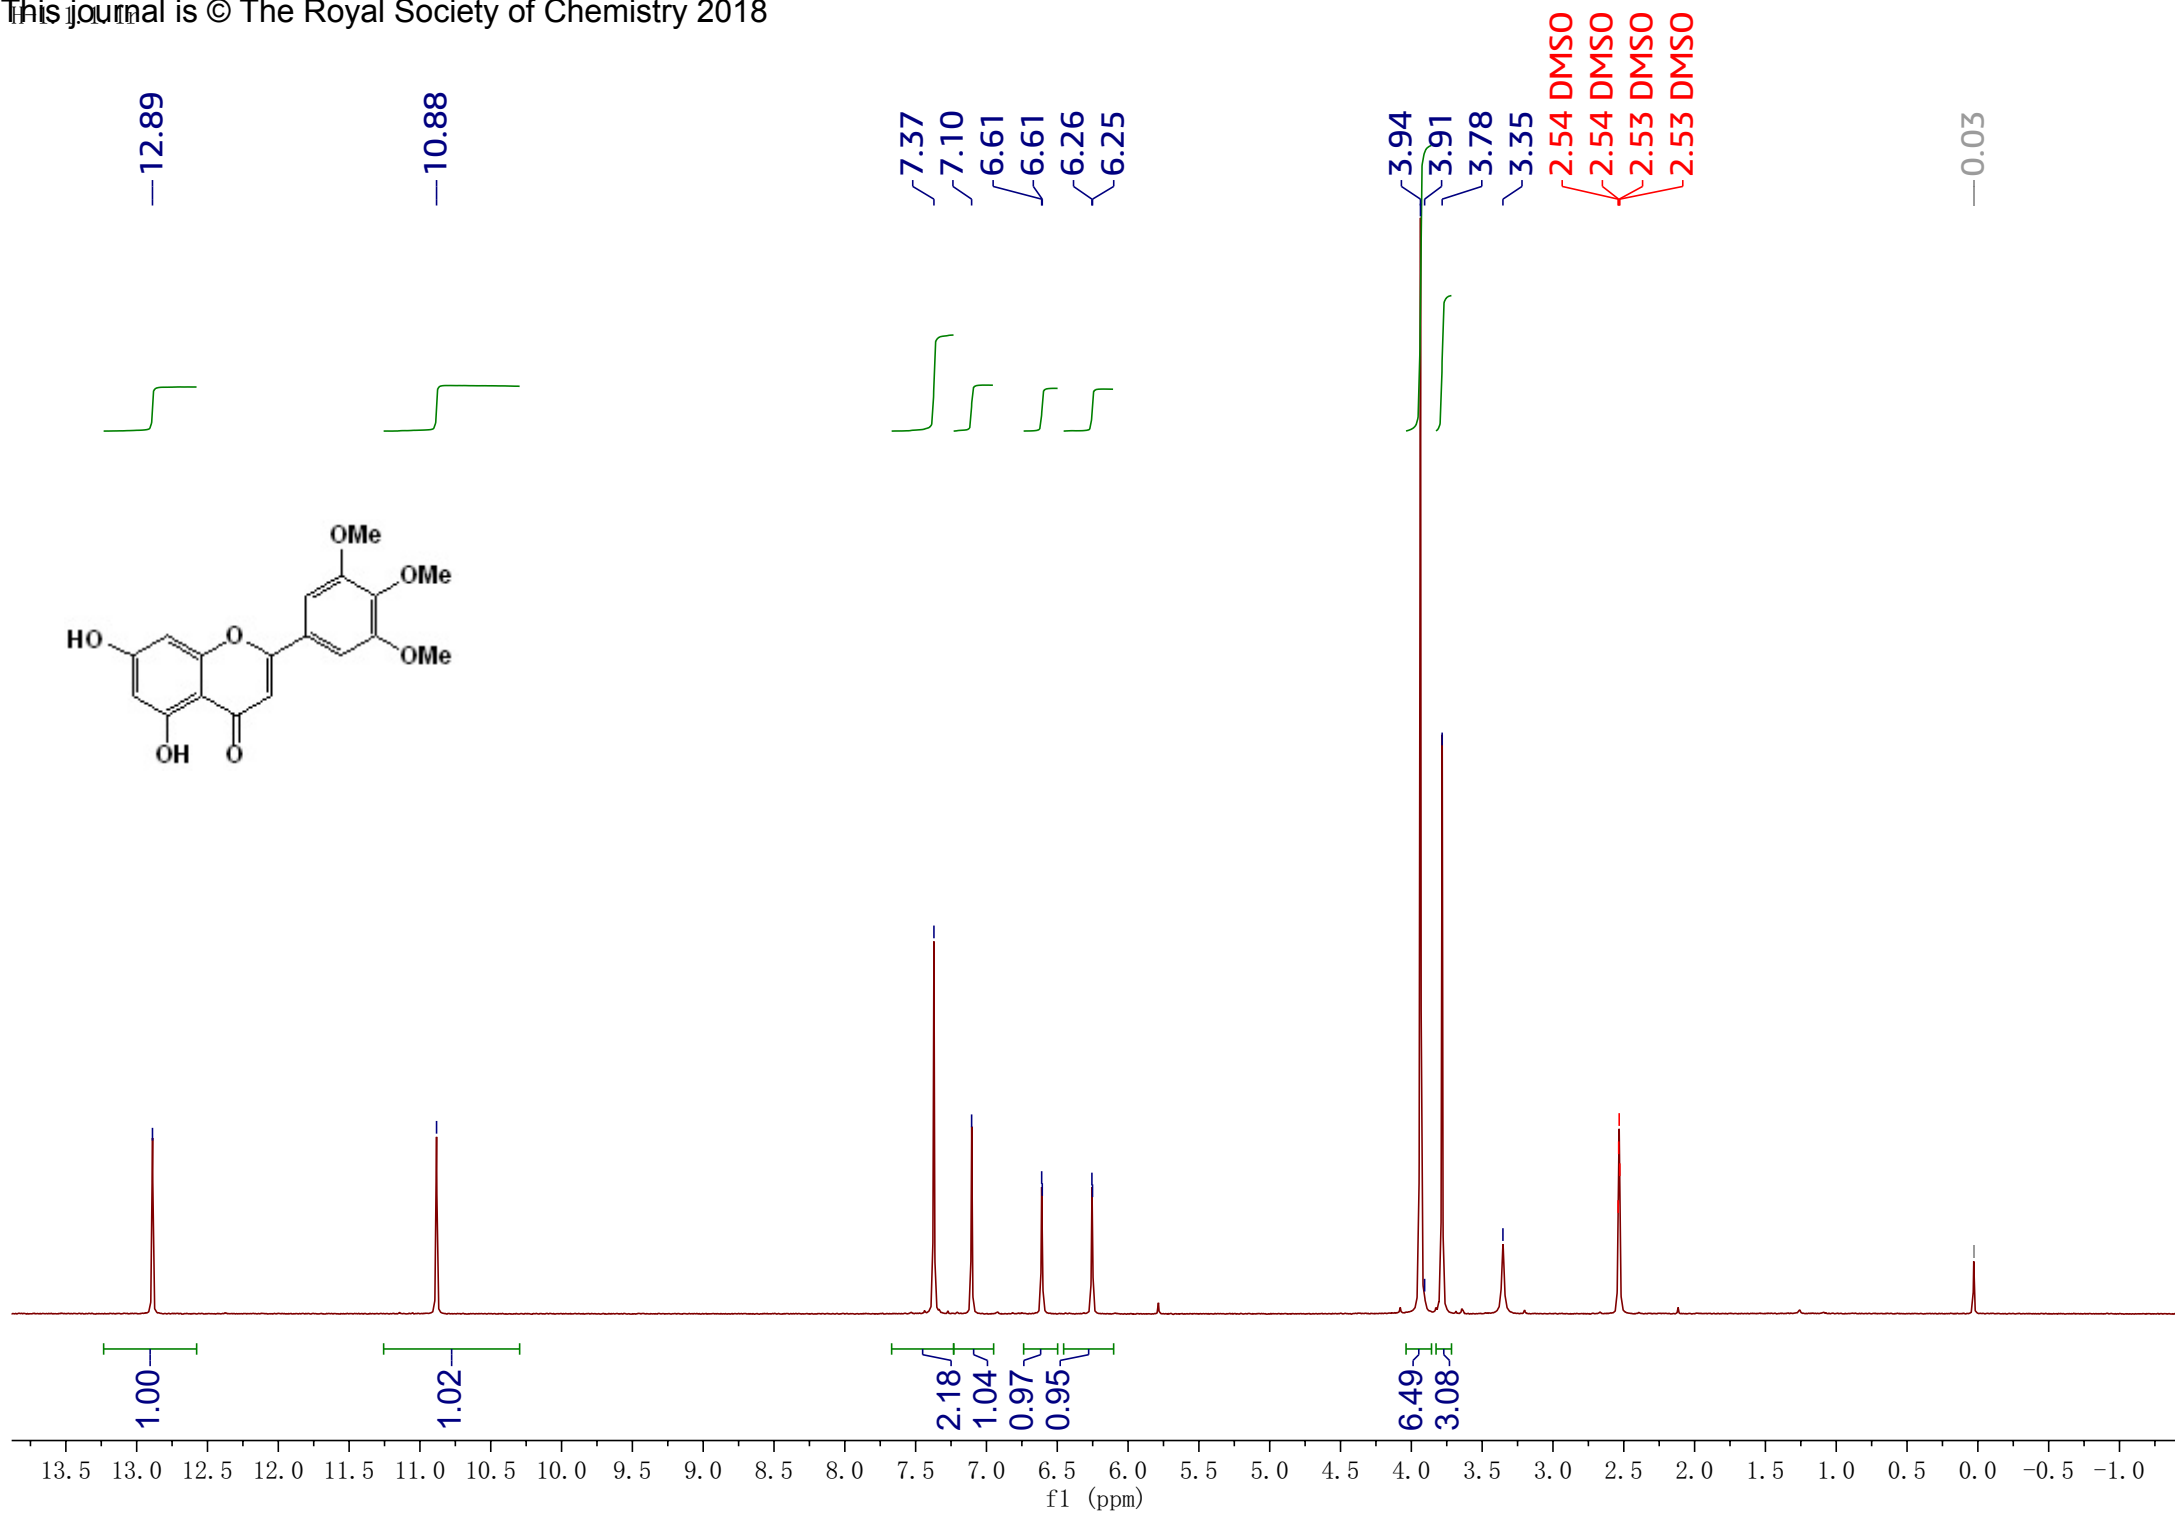

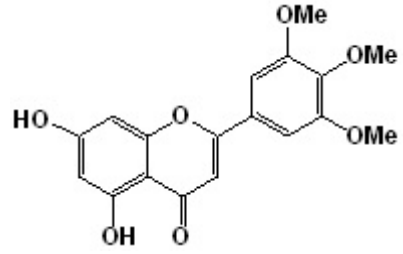

—182.36

164.79

163.51

161.85

157.87

153.70

—141.20

—126.45

105.49

104.57

104.31

99.42

94.79

60.70

56.76

56.51

40.52 DMSO

40.31 DMSO

40.10 DMSO

39.89 DMSO

39.68 DMSO

39.47 DMSO

39.26 DMSO

18.99

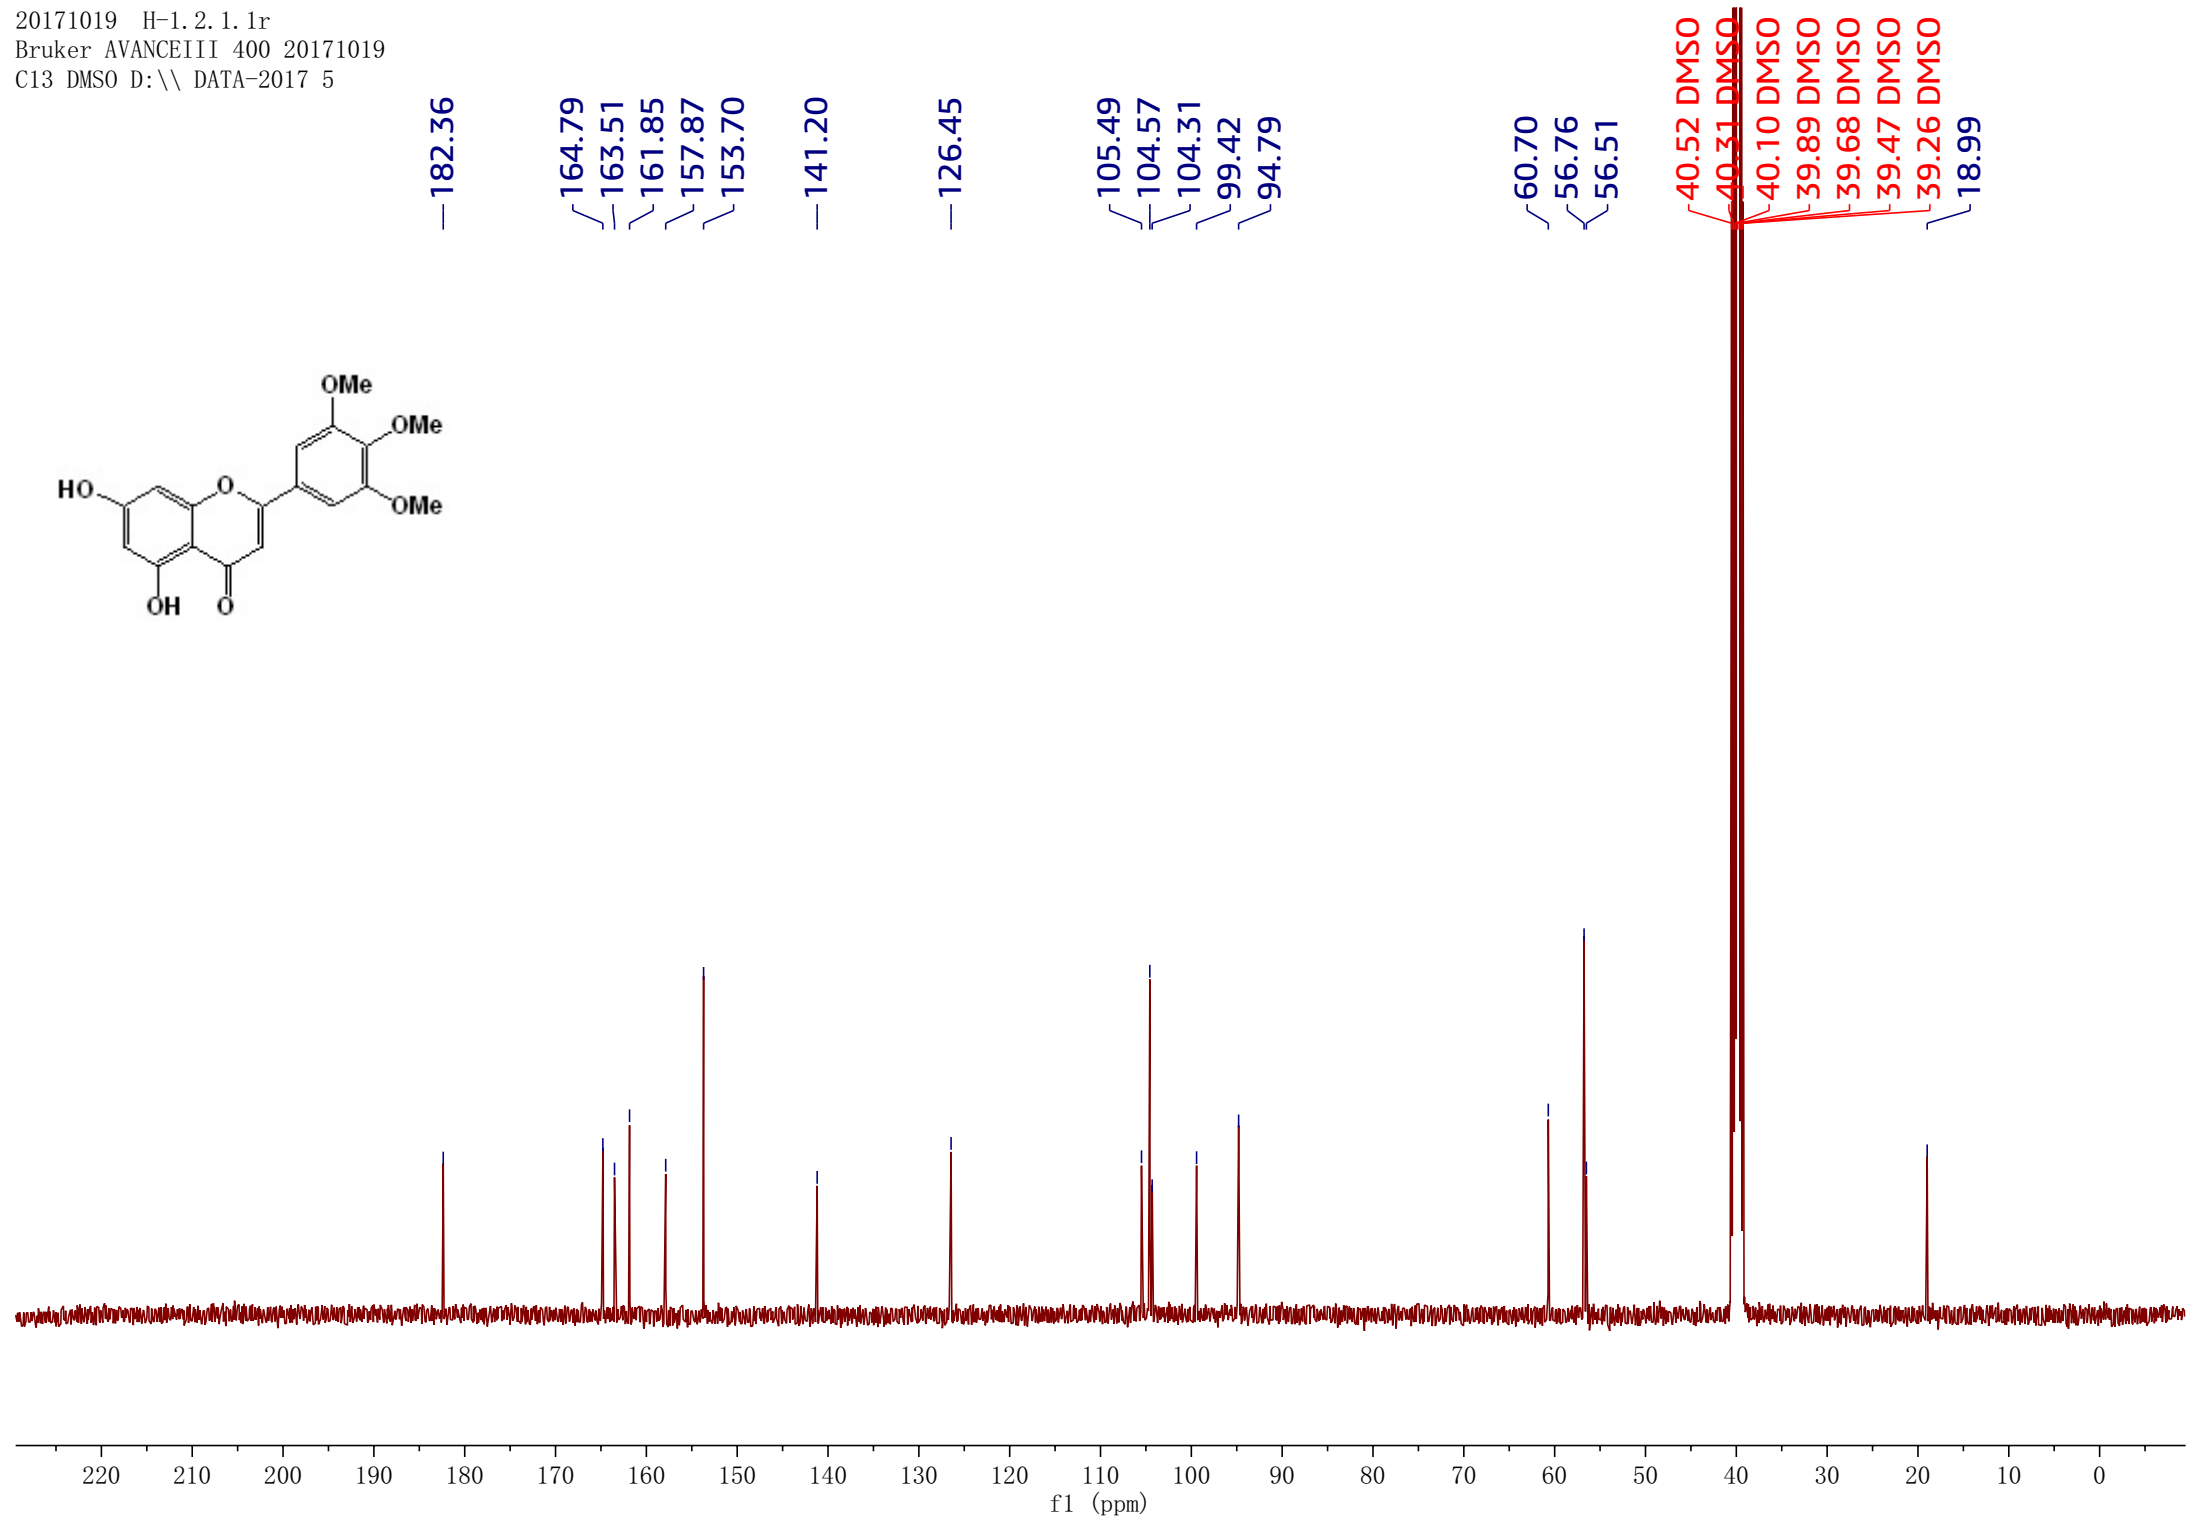

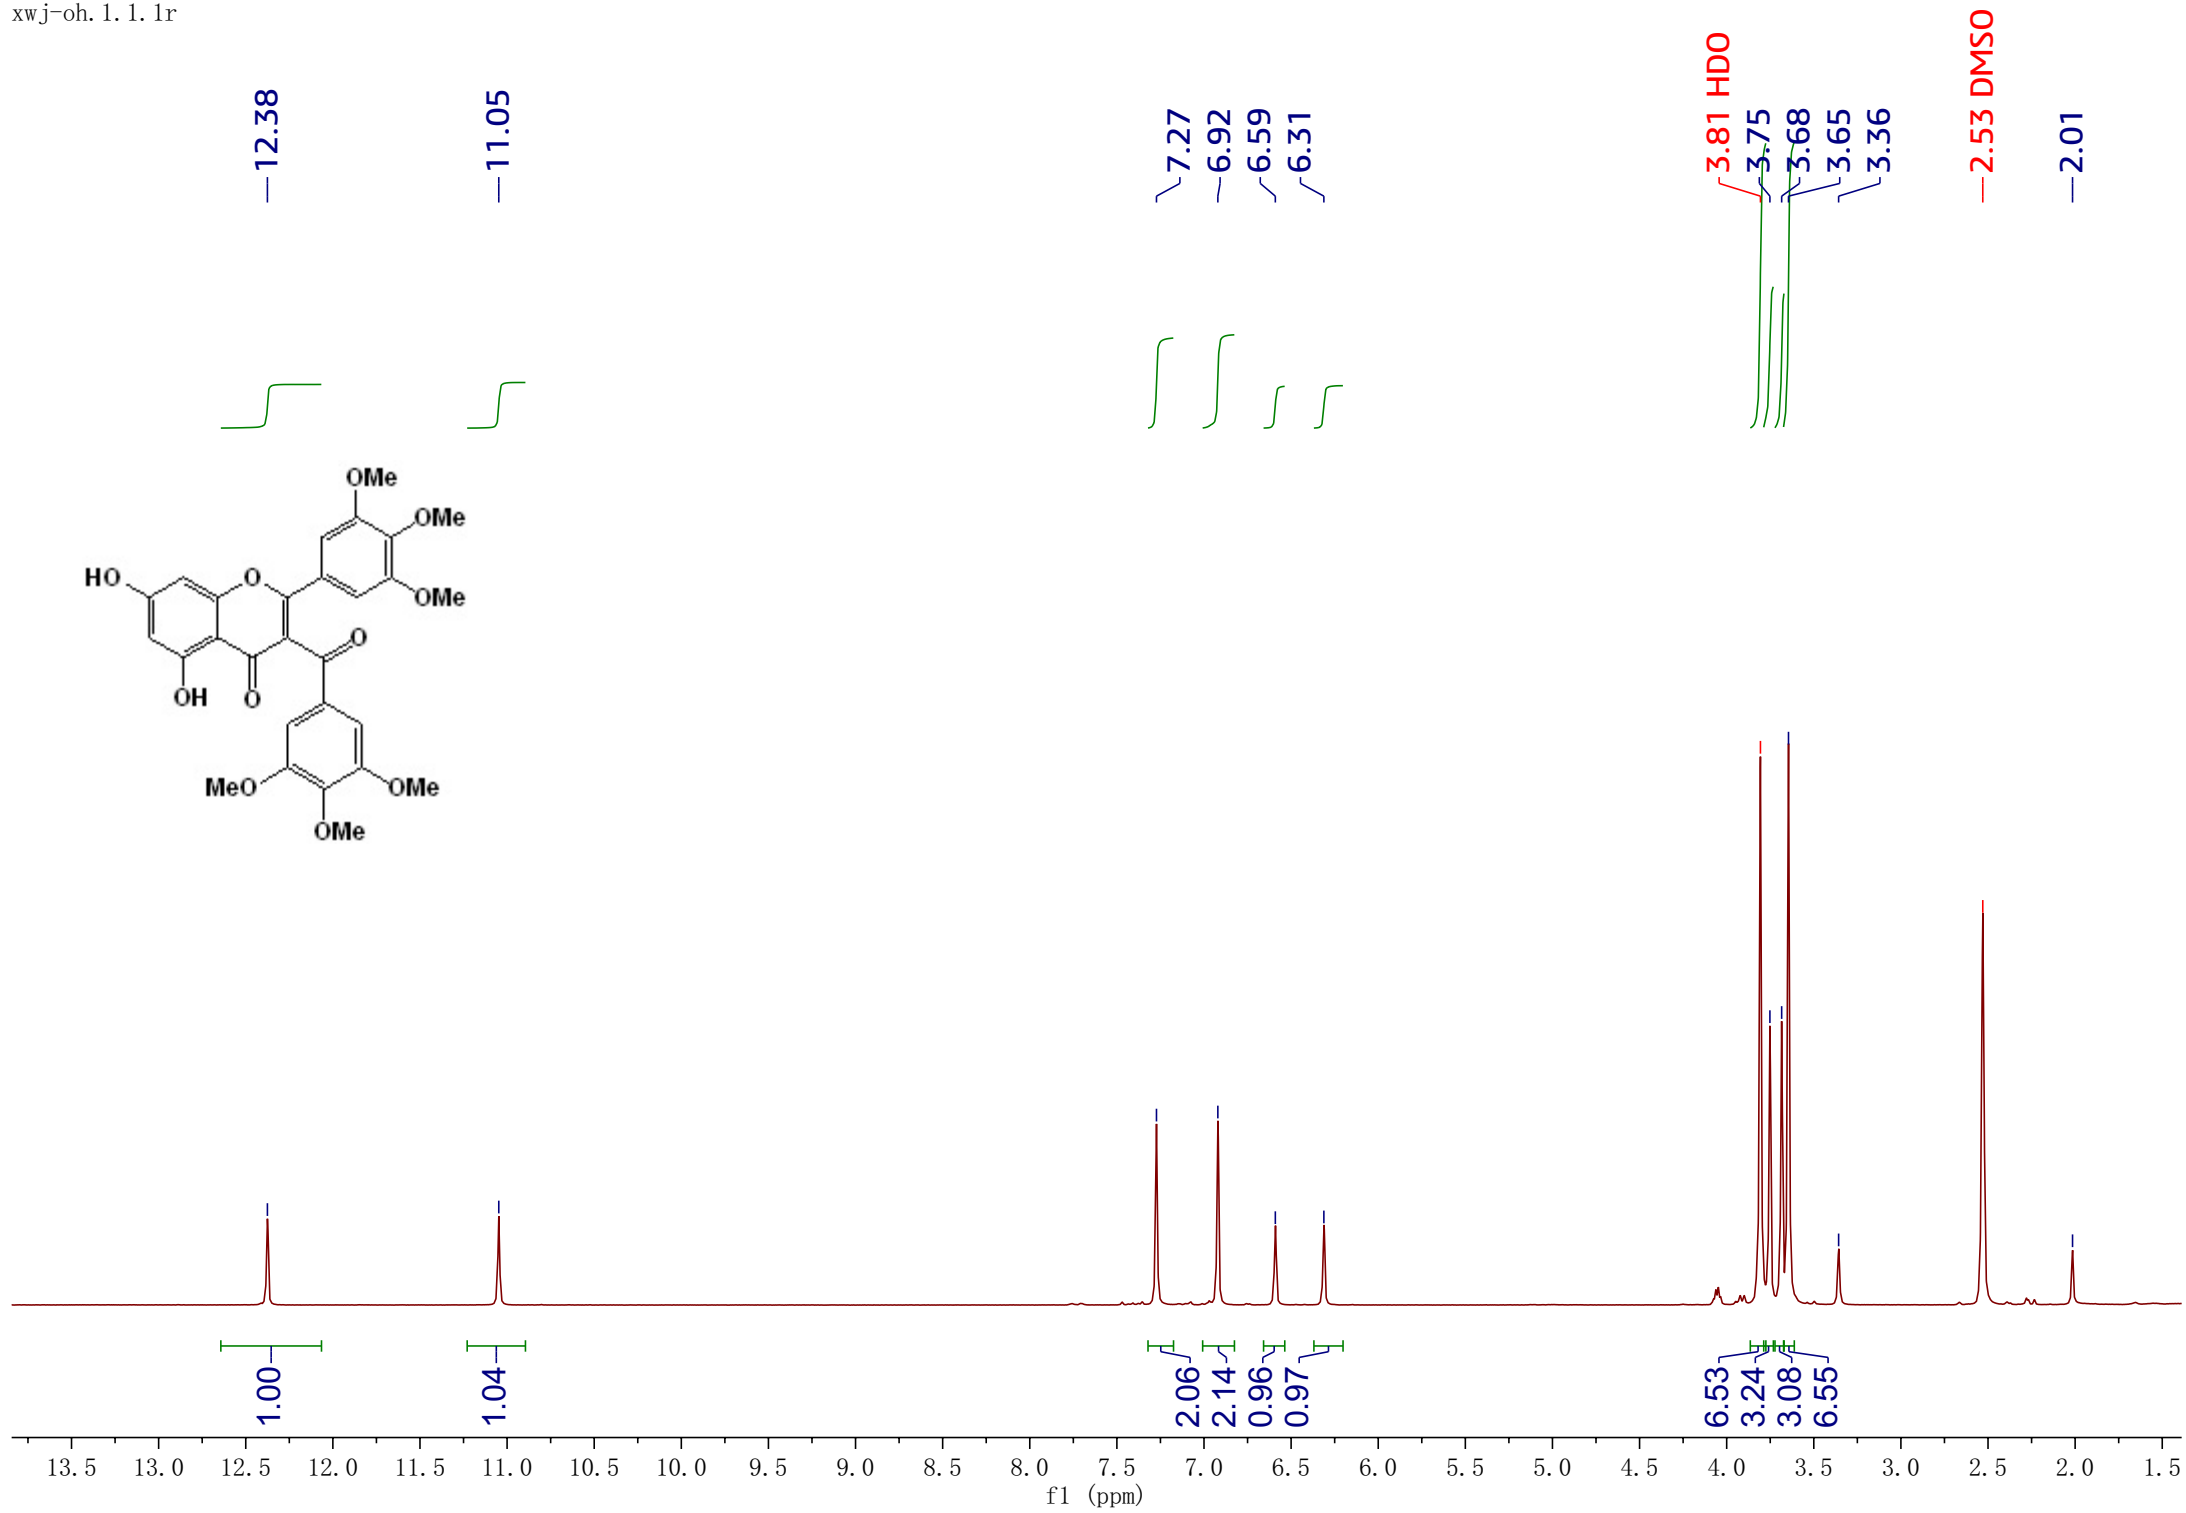

20161122-xwj-oh. 1. 1. 1r  
BRUKER AV-III-500 13C-NMR xwj-oh IN DMSO 2016. 11. 22  
13C-NMR DMSO E:\\ wusong1 1

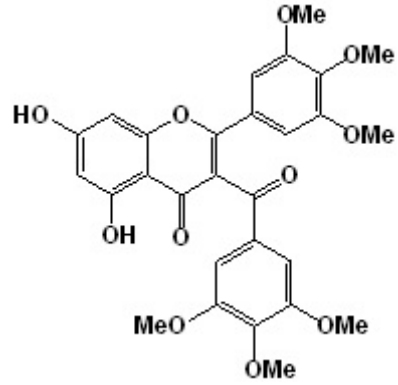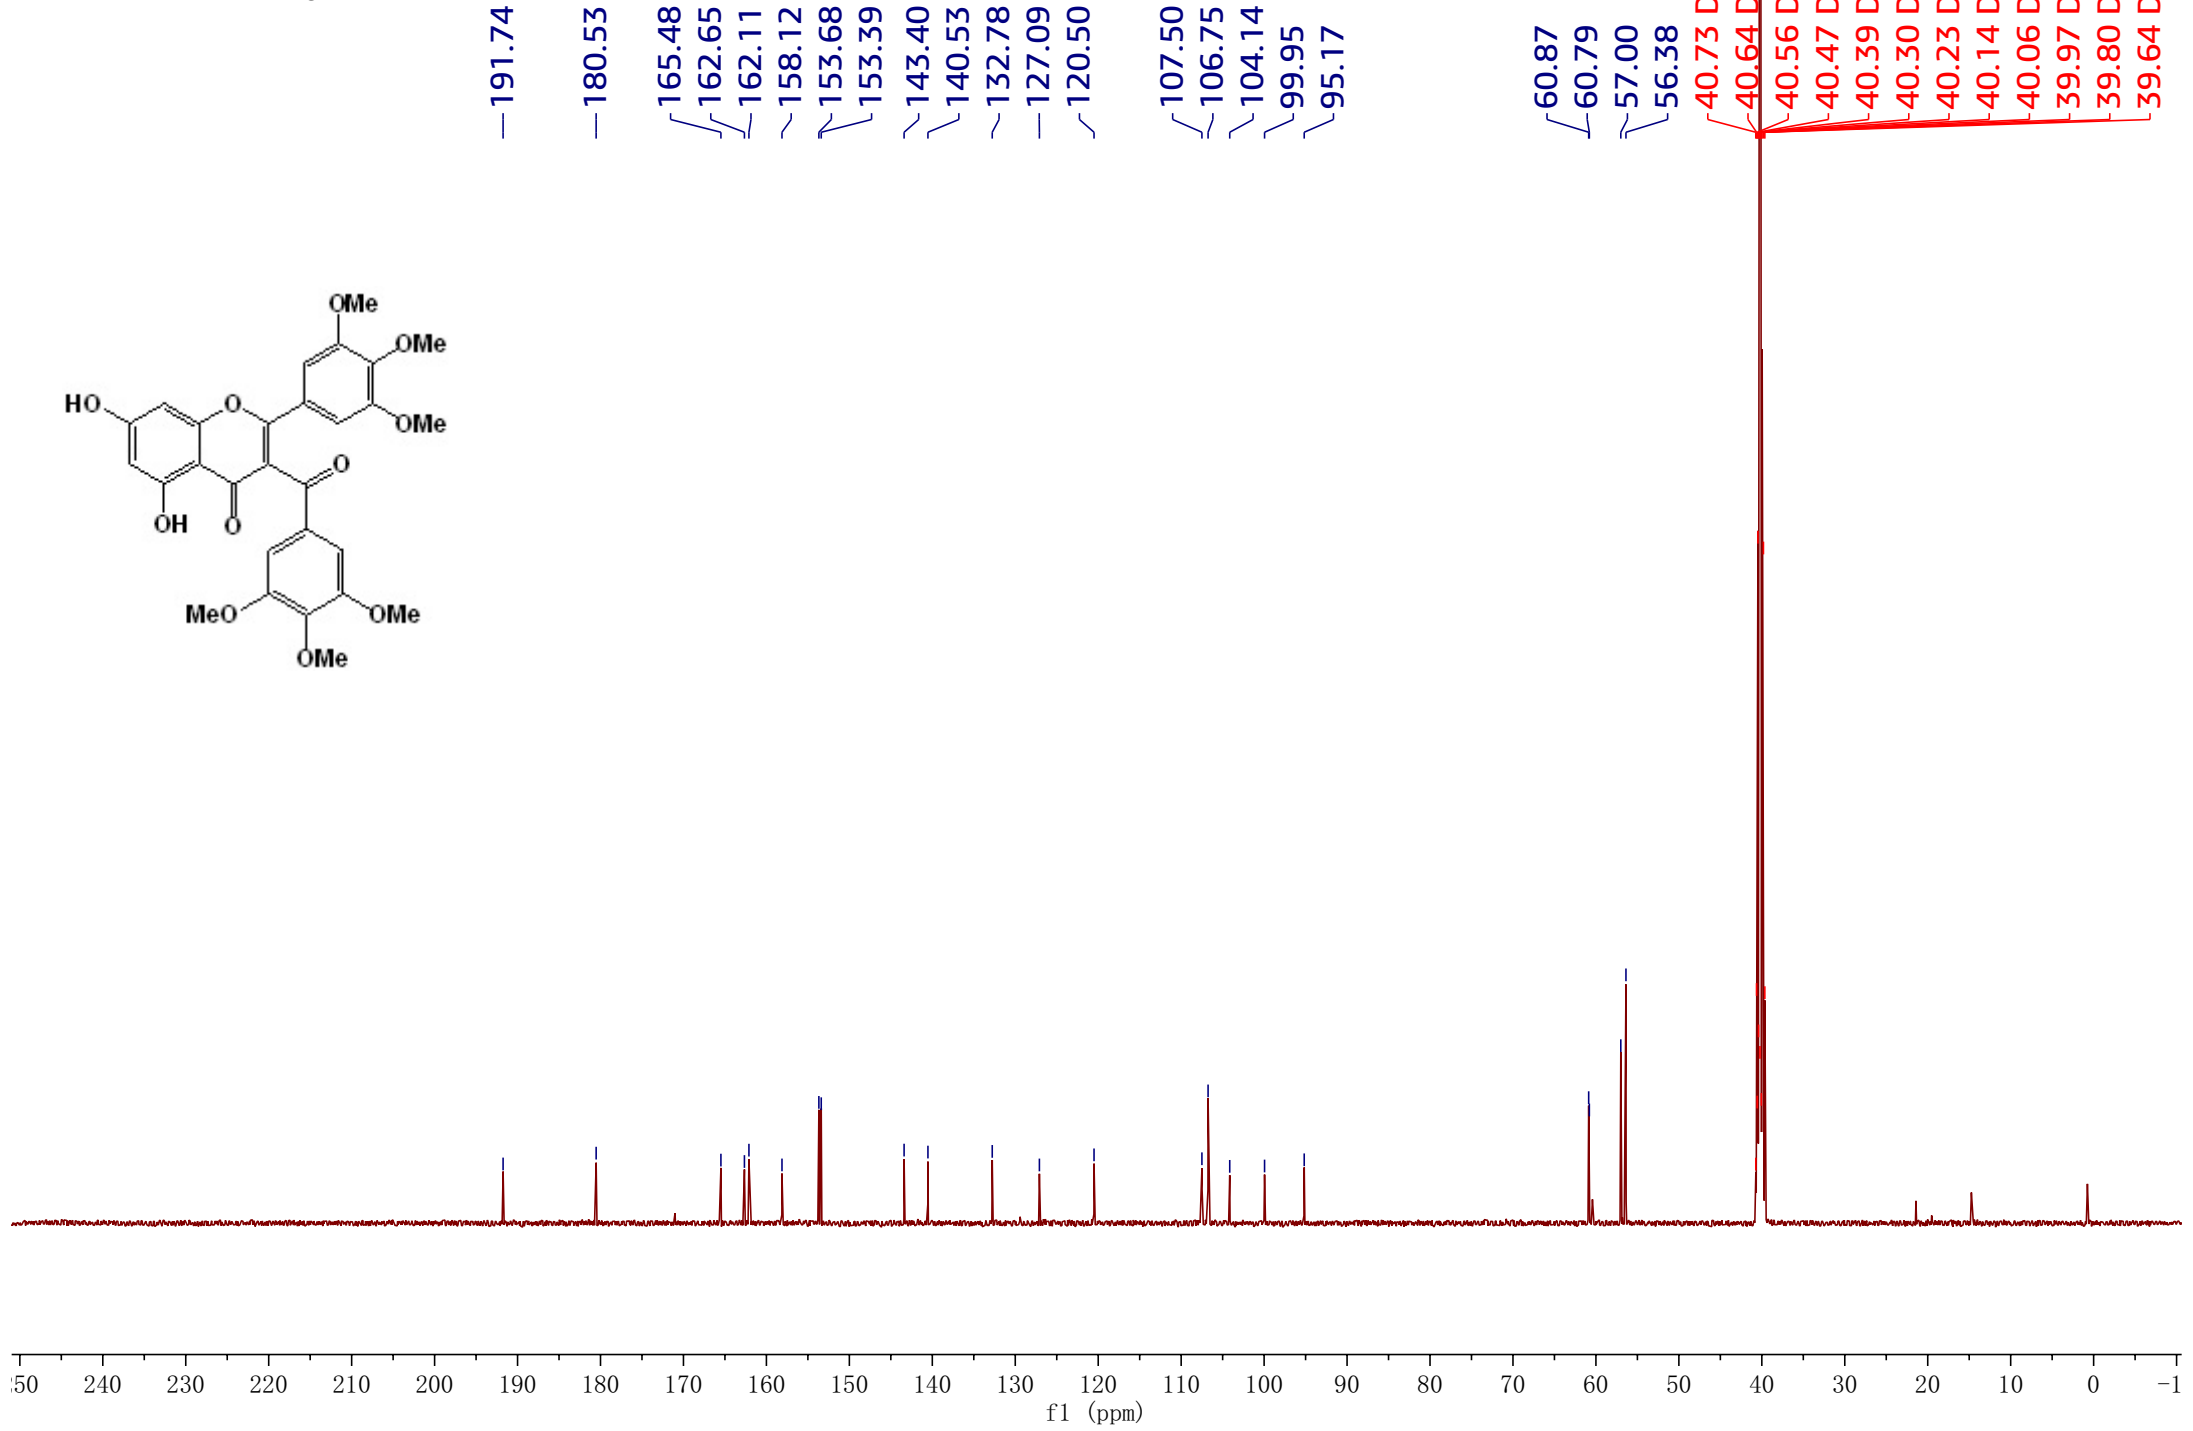

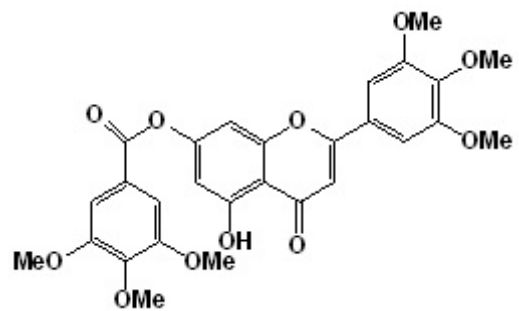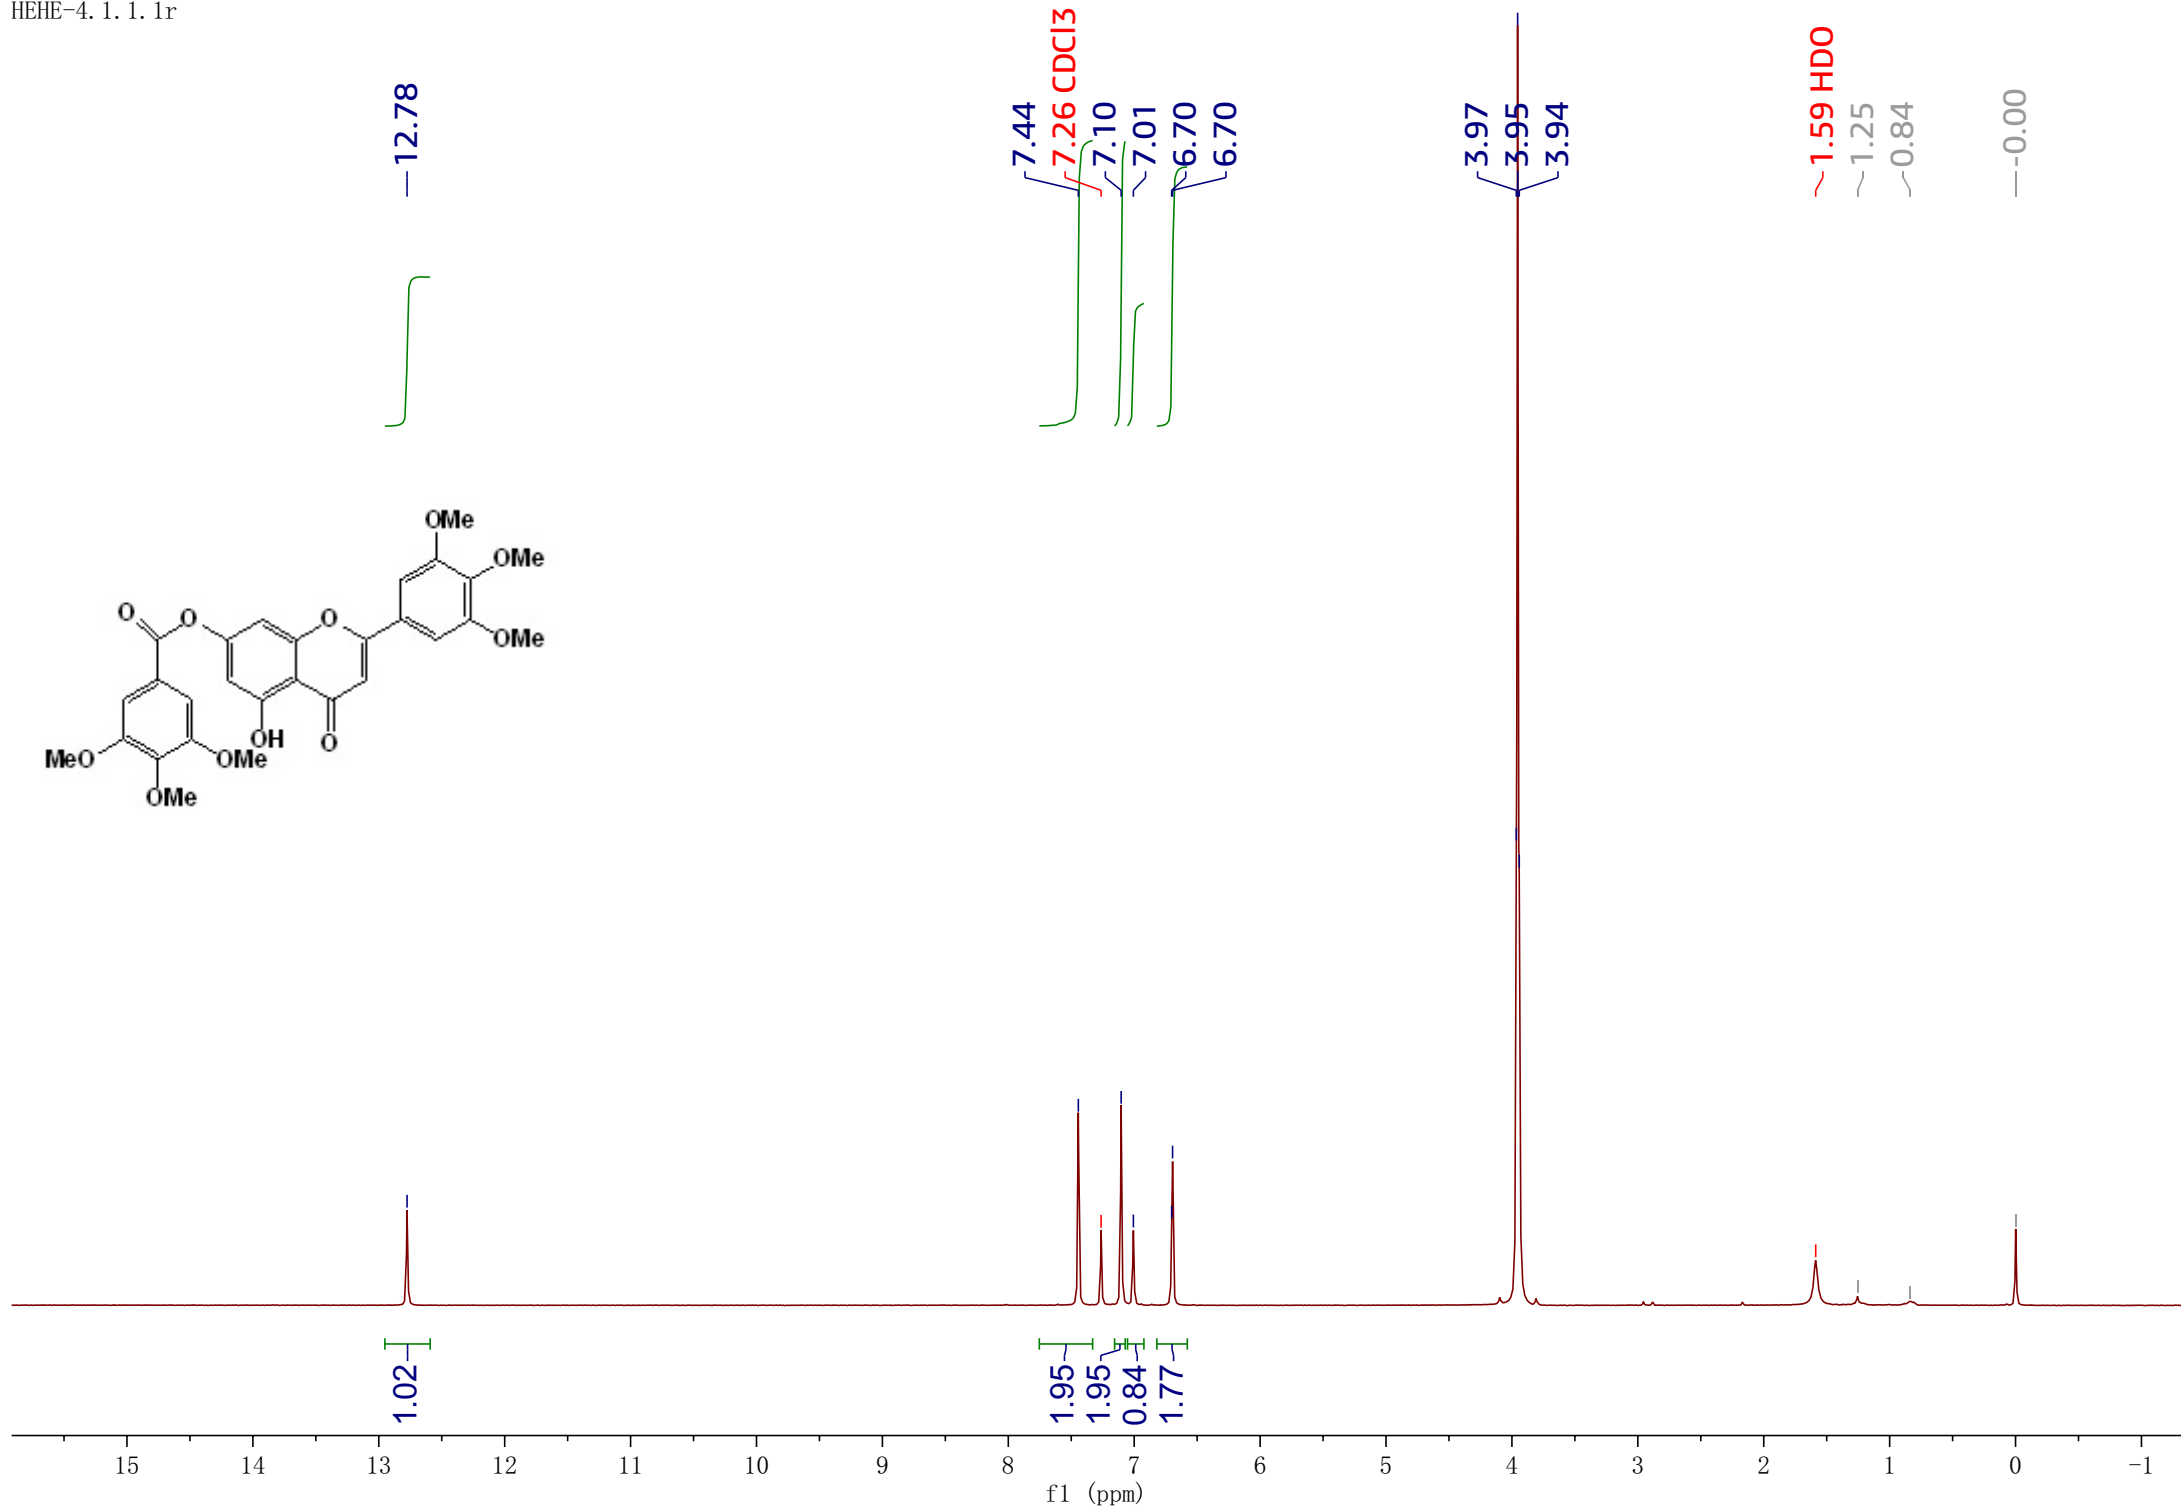

20171106 HEHF-4. 1. 1. 1r  
Bruker AVANCEIII 400 20171106  
C13 CDC13 D:\ DATA-20171109

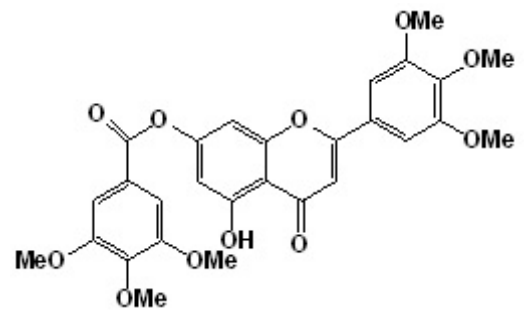

182.78  
164.58  
164.00  
162.04  
156.75  
156.30  
153.68  
153.18  
143.32  
141.75

126.11  
123.51  
108.94  
107.59  
105.91  
105.73  
103.84  
101.30

77.38  
77.26  
77.06  
76.74  
61.12  
61.08  
56.41

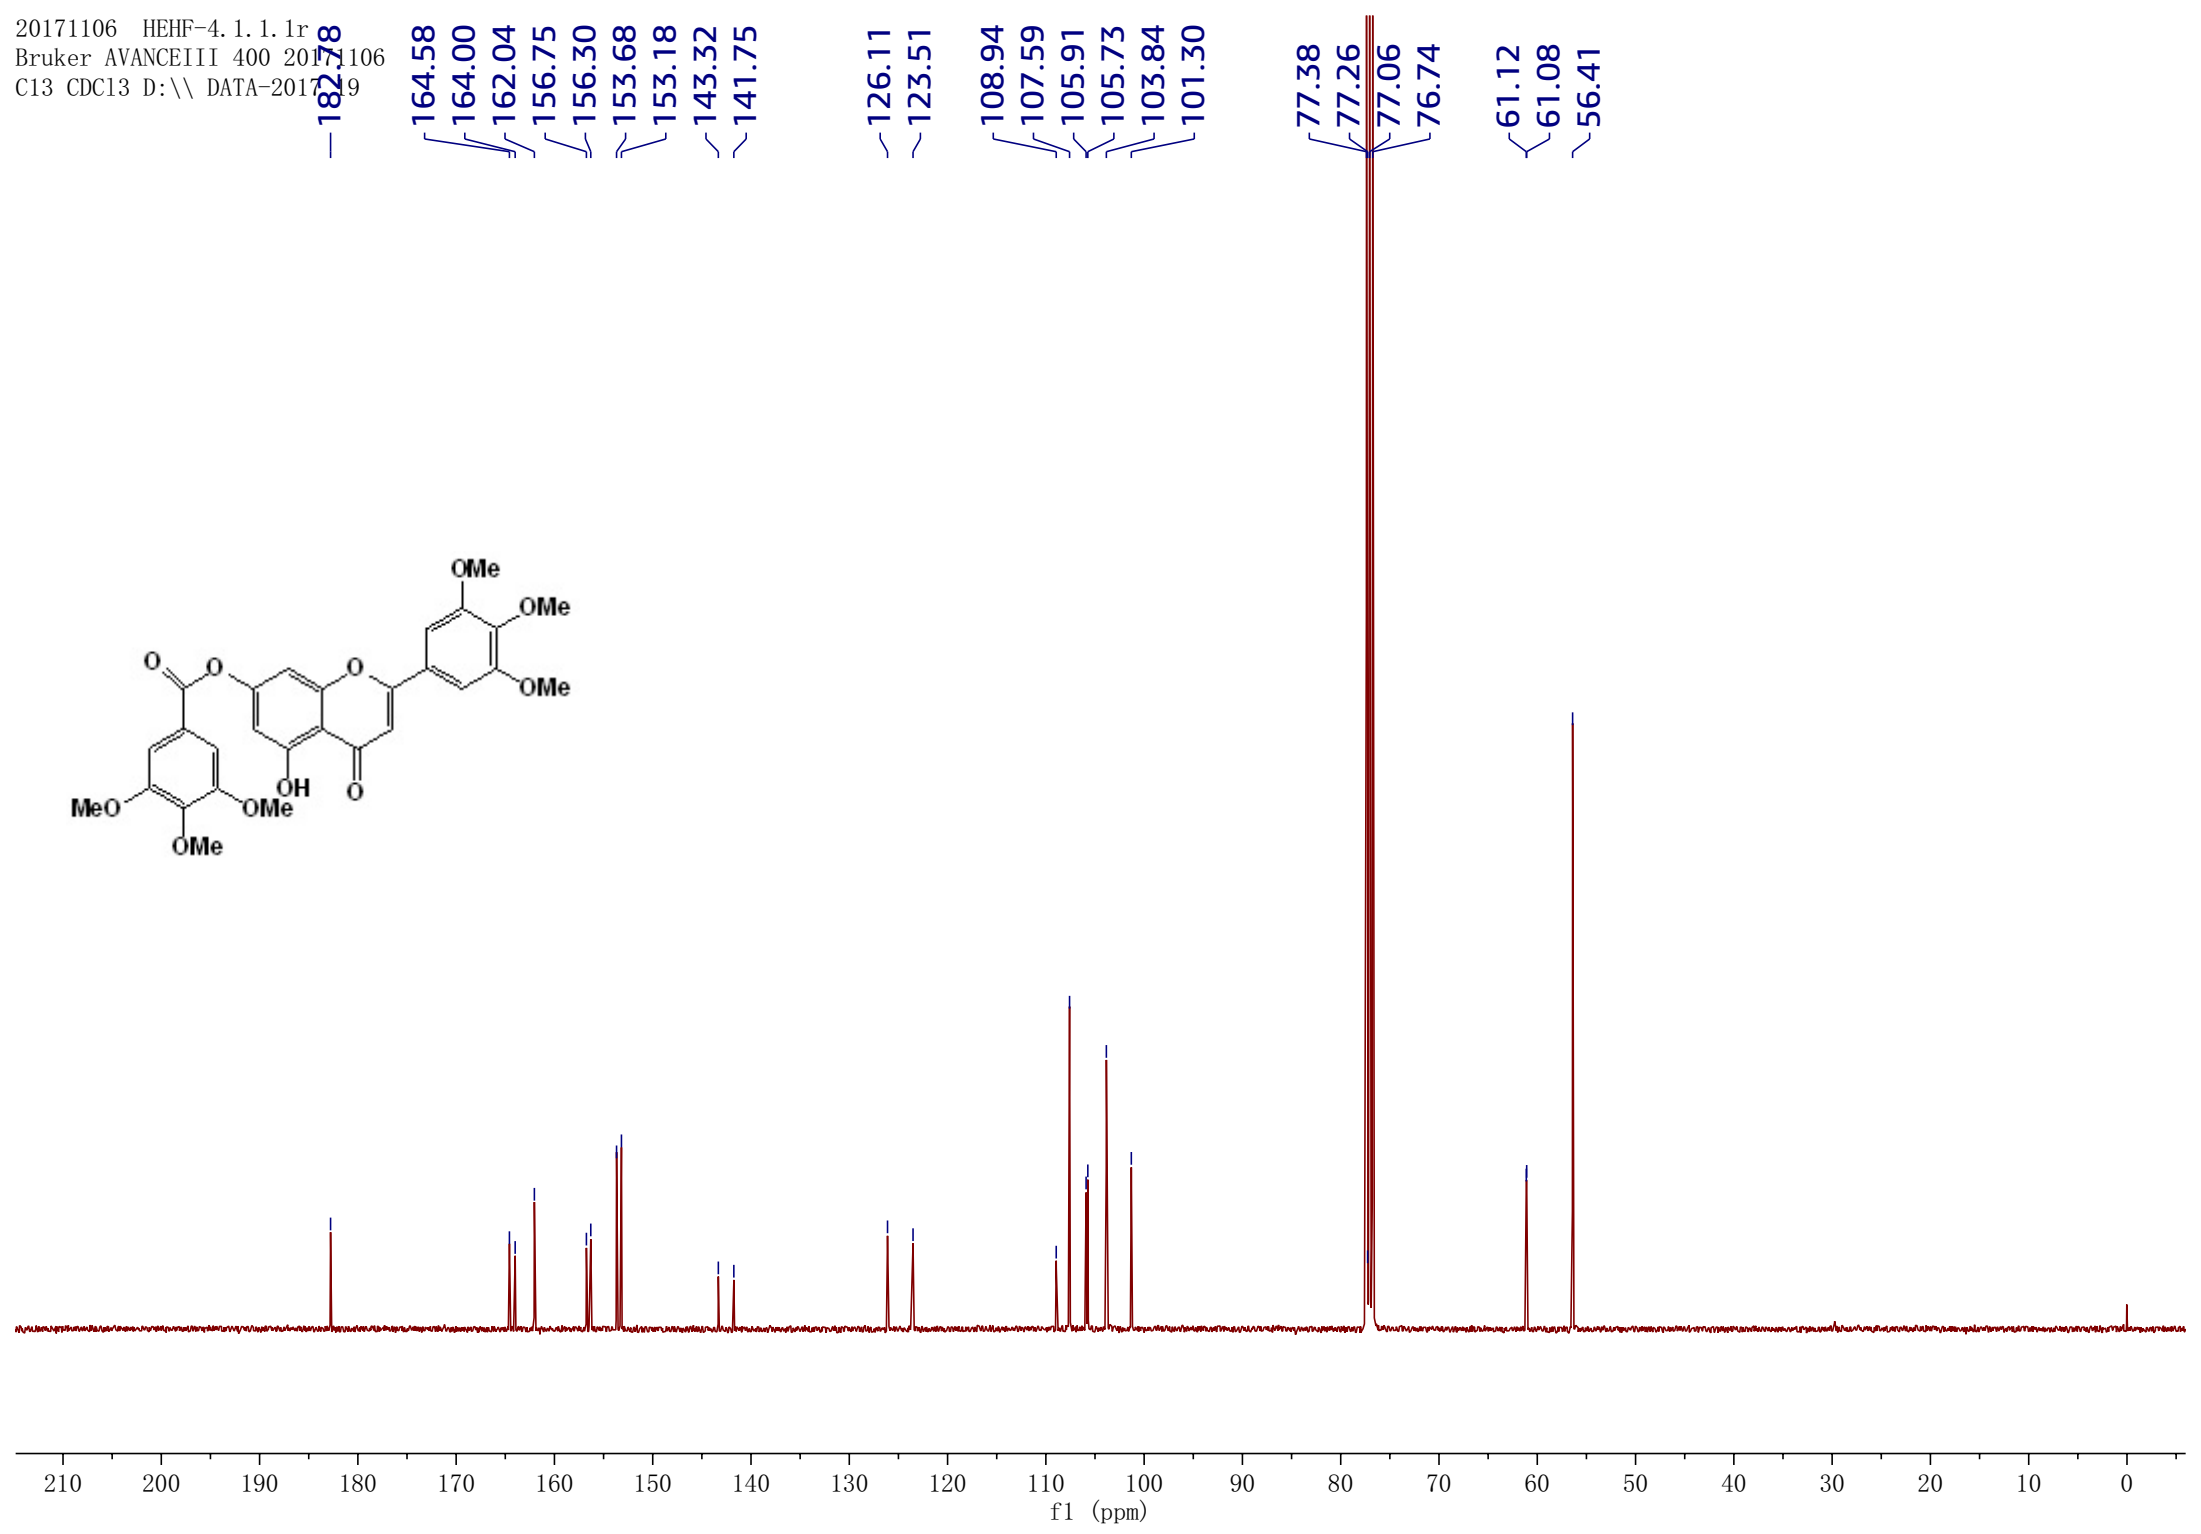

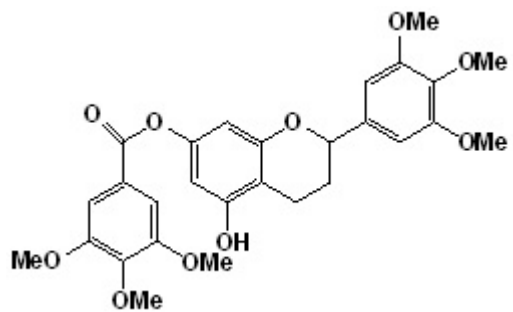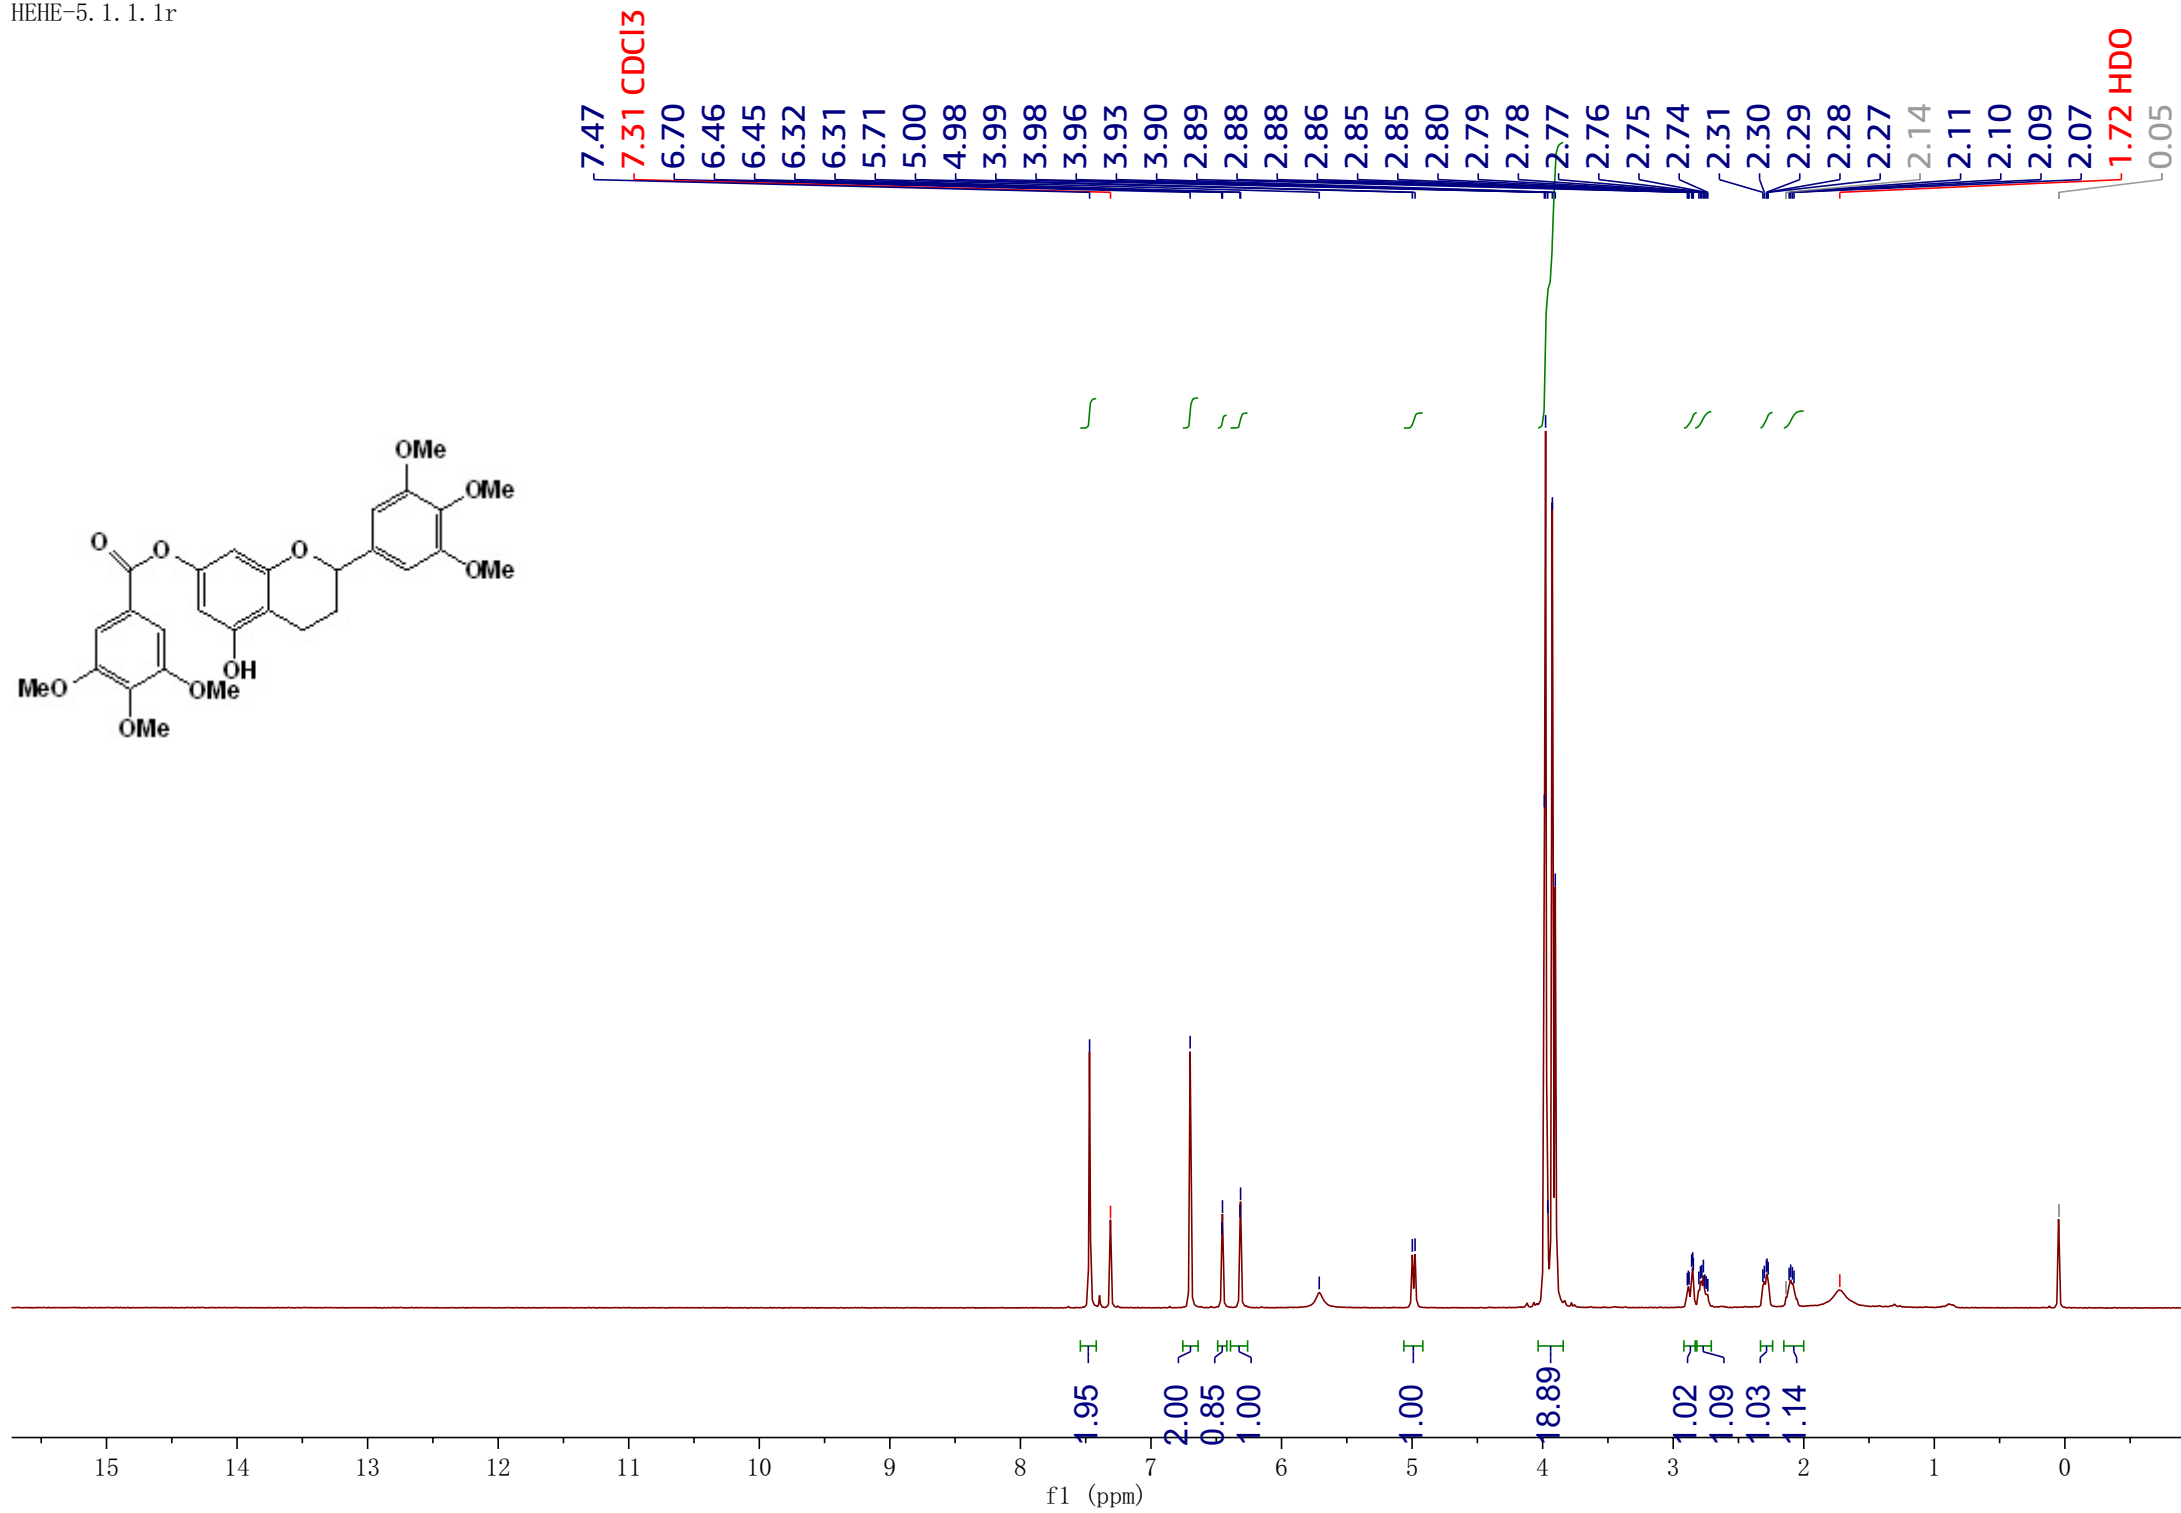

20171019 HEHF-5.2.1.1r  
Bruker AVANCEIII 400 20171019  
C13 CDC13 D:\\ DATA-2017 8

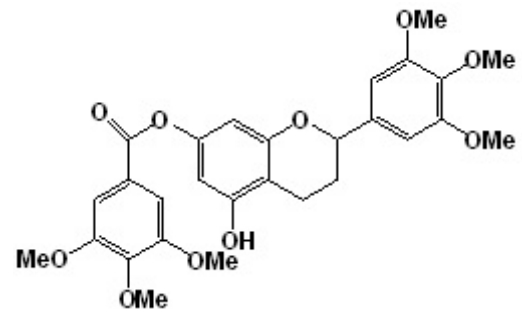

165.26  
156.57  
154.78  
153.38  
153.06  
153.04  
149.83  
142.86  
137.56  
137.05  
— 124.29

107.49  
103.08  
102.75  
101.26  
78.00  
77.38  
77.27  
77.07  
76.81  
76.75  
61.04  
60.89  
56.37  
56.27  
56.18  
— 29.48  
— 19.58

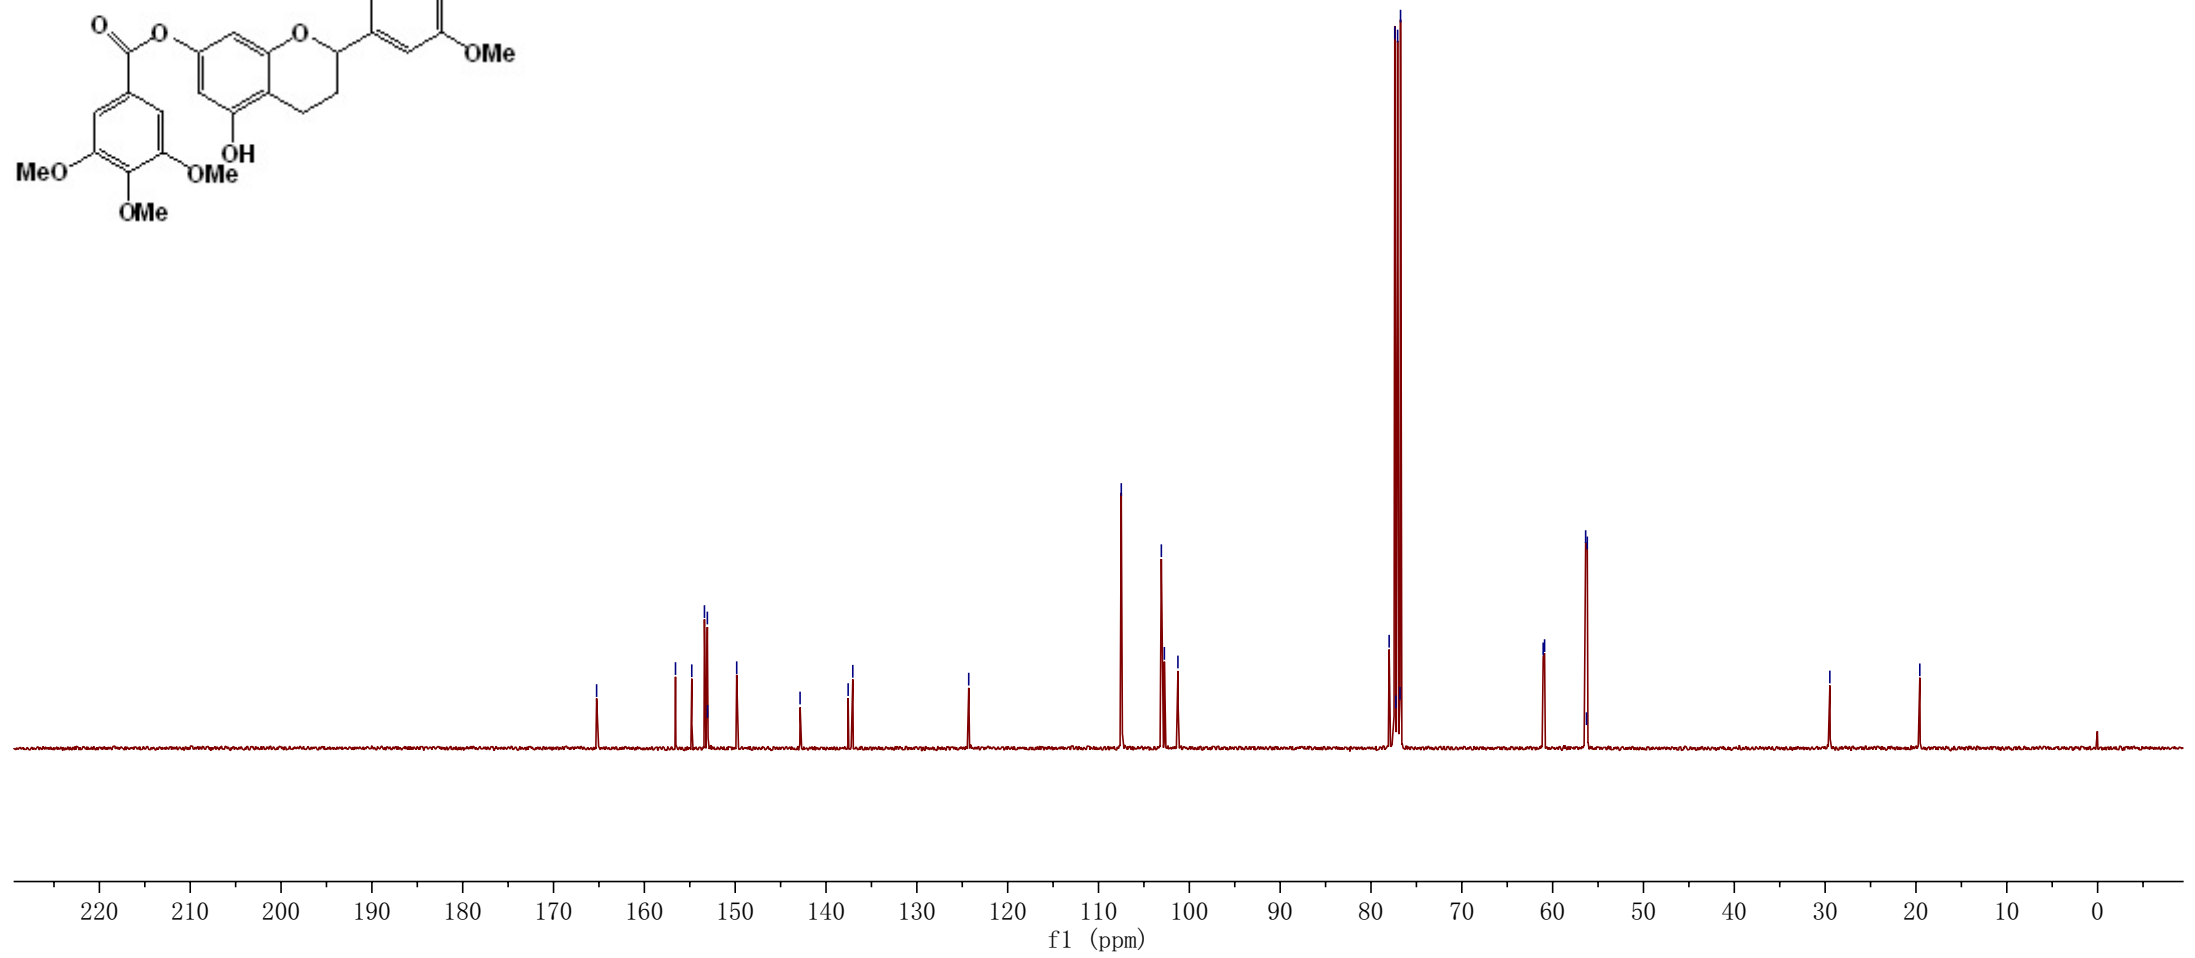



20170307 zwx 5.1.1.1r  
Bruker AVANCE III 400 20170307  
PROTON2 CDC13H3:\ \ DATA-2017 34

7.48 7.47 7.42 7.30 6.70 6.50 6.49 6.36 6.36 4.99 4.99 4.96 4.96 4.18 4.16 4.15 4.13 3.98 3.98 3.92 3.89 3.87 3.86 2.92 2.89 2.88 2.88 2.87 2.78 2.76 2.76 2.75 2.74 2.74 2.74 2.28 2.28 2.26 2.26 2.25 2.25 2.24 2.09 HDO 2.08 HDO 2.07 HDO 2.06 2.05 HDO 2.04 1.31 1.29 1.29 1.28 1.27 1.25

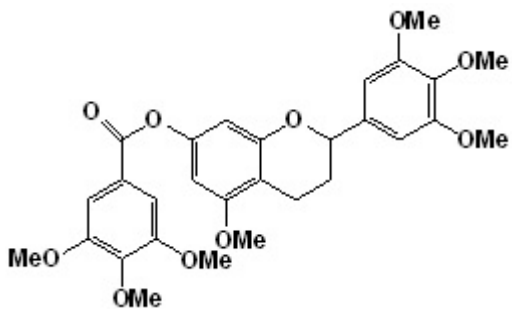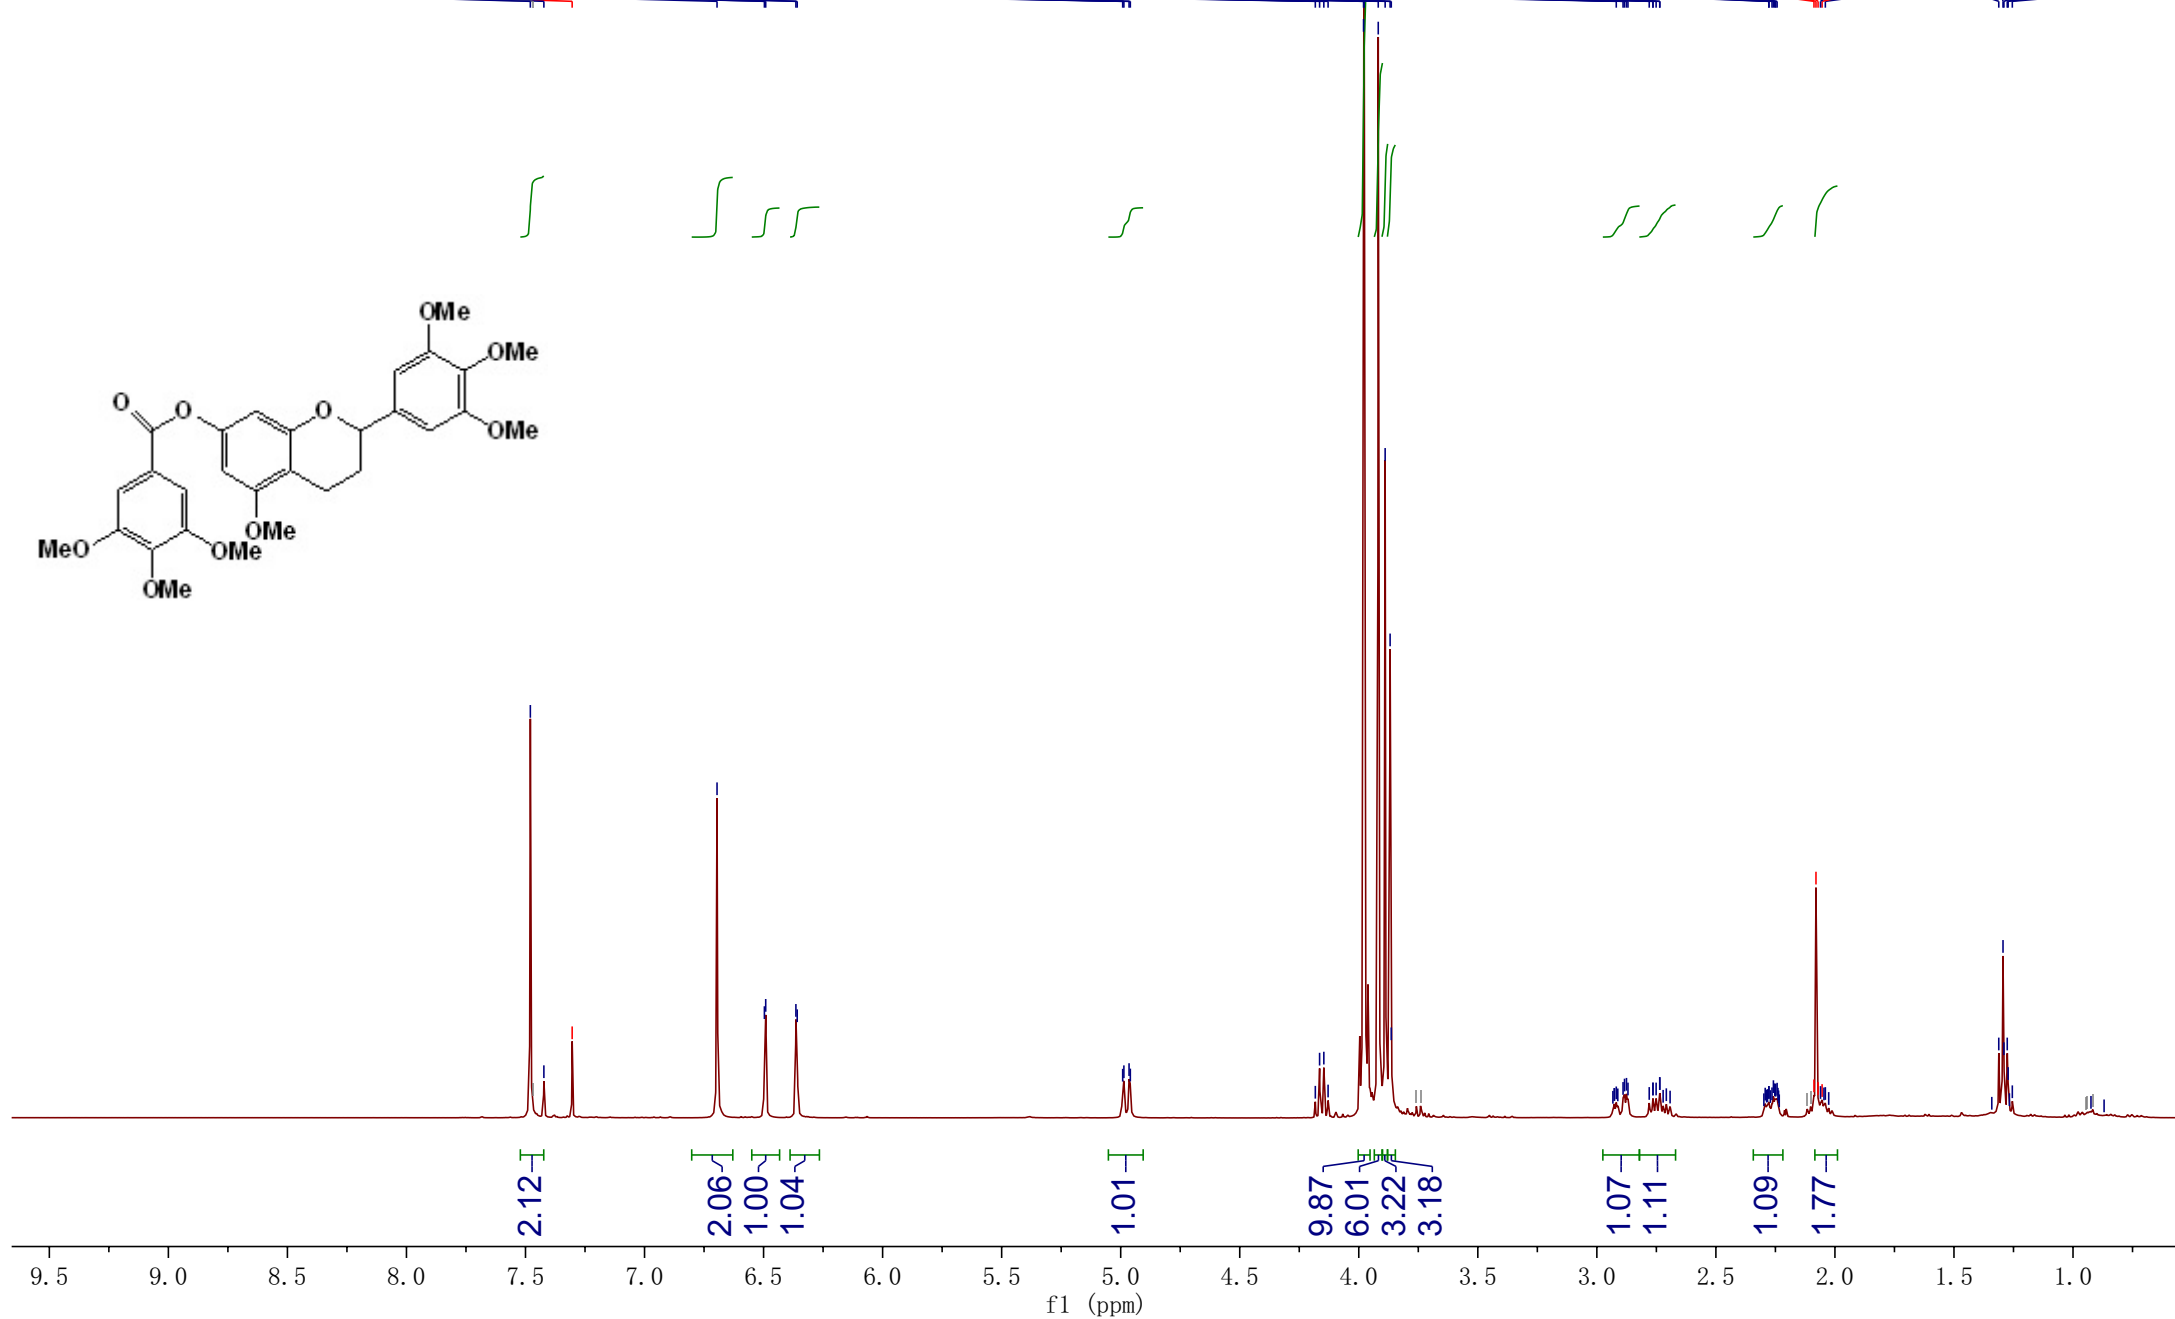

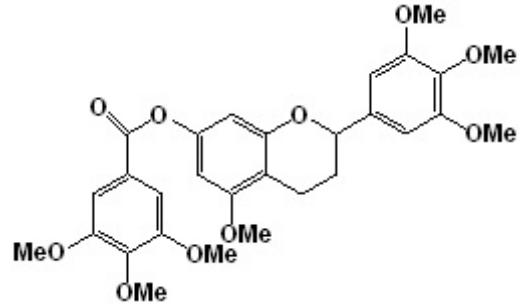

164.97  
158.35  
156.11  
153.38  
153.07  
150.23  
142.80  
137.57  
137.17  
137.15  
124.47

108.68  
107.42  
103.23  
103.08  
96.86

78.04  
77.41 CDC13  
77.09 CDC13  
76.77 CDC13  
61.02  
60.86  
60.42  
56.35  
56.17  
55.68

29.56  
19.80  
14.23

1.05  
0.02

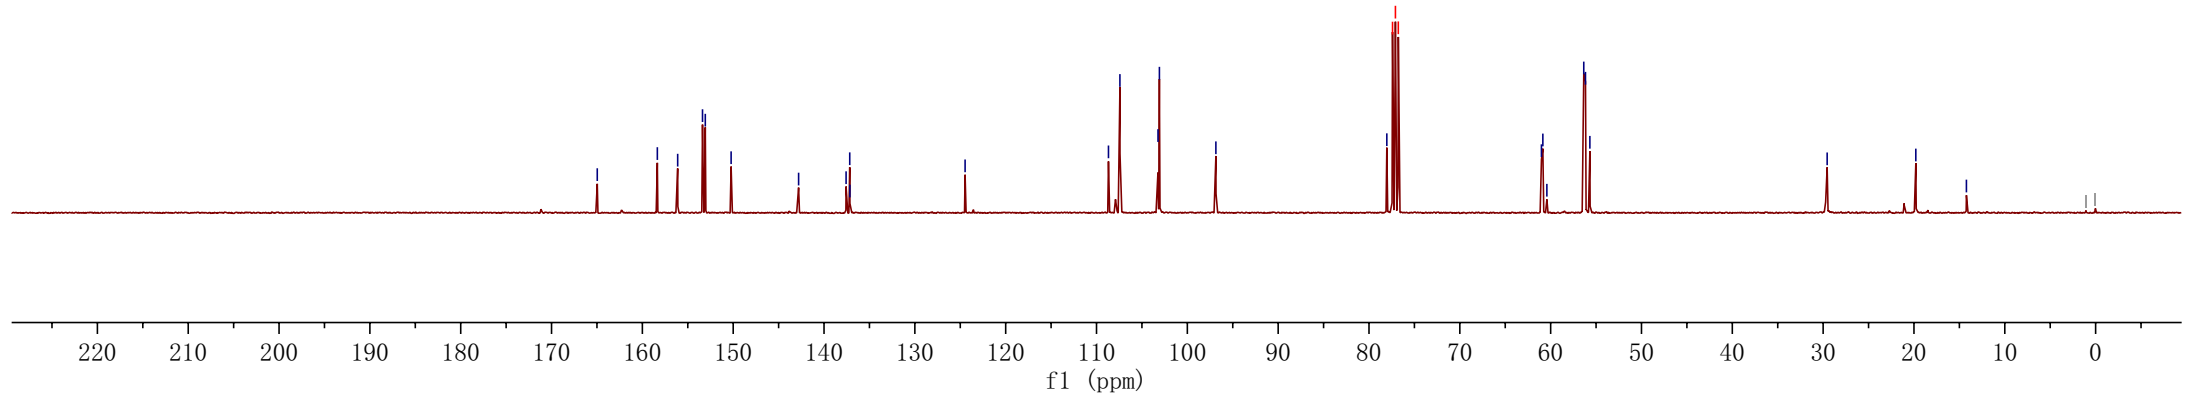

20171128 HEHF-1188-1-1-1  
Bruker AVANCE III 400 20171128  
PROTON2 MeOD D:\DATA\2017-11-

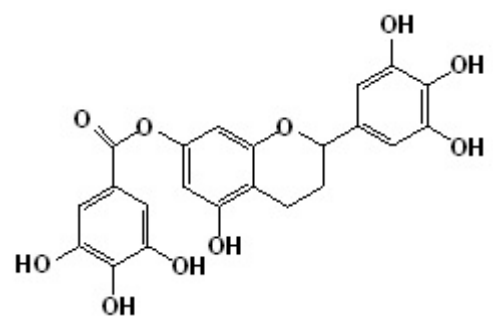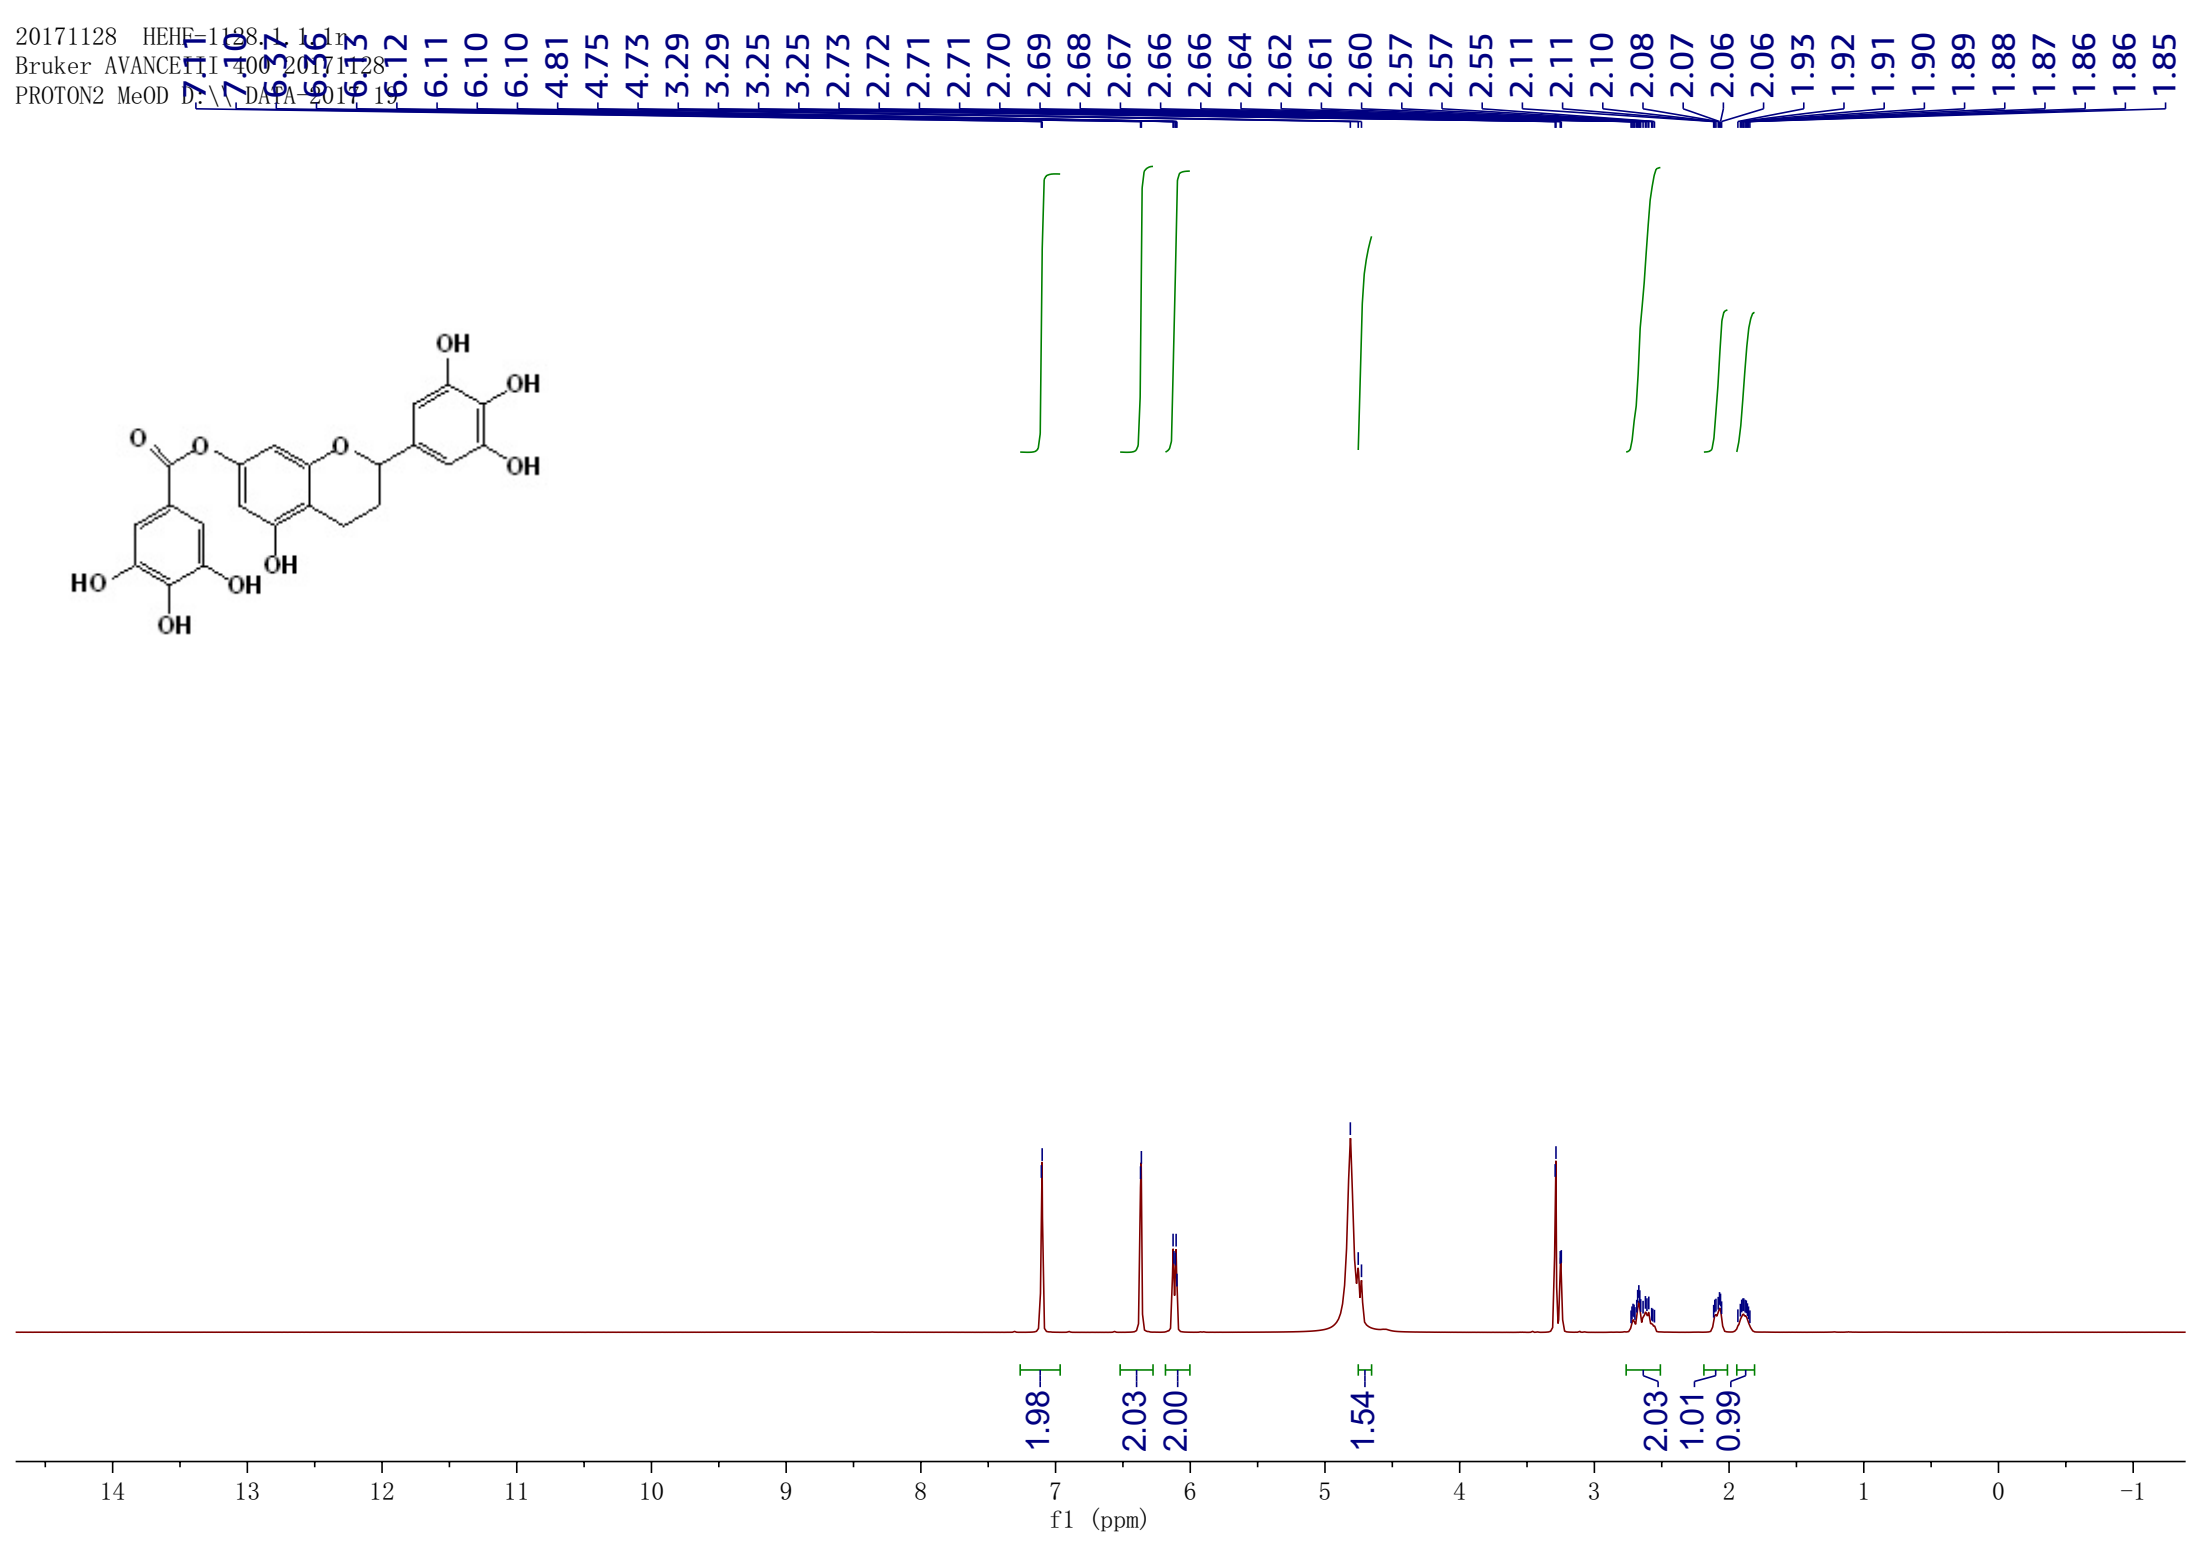

20171128 HEHF-1128.2.1.1r  
Bruker AVANCEIII 400 20171128  
C13 MeOD D:\ DATA-2017 19

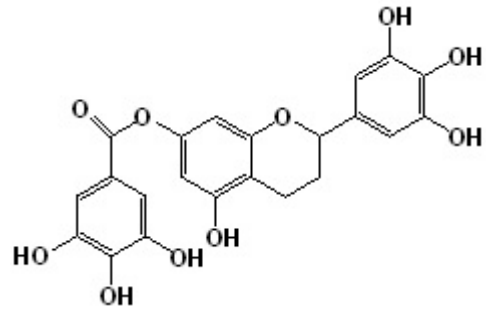

— 165.68  
└ 156.35  
└ 155.88  
└ 150.02  
└ 145.47  
└ 145.21  
└ 139.00  
└ 132.61  
└ 132.29  
  
— 119.32  
└ 109.07  
└ 107.21  
└ 104.79  
└ 101.01  
└ 100.05

└ 77.66  
└ 48.44  
└ 48.23  
└ 48.09  
└ 48.02  
└ 47.87  
└ 47.80  
└ 47.59  
└ 47.38  
└ 47.17  
└ 46.95  
  
— 29.01  
  
— 19.00

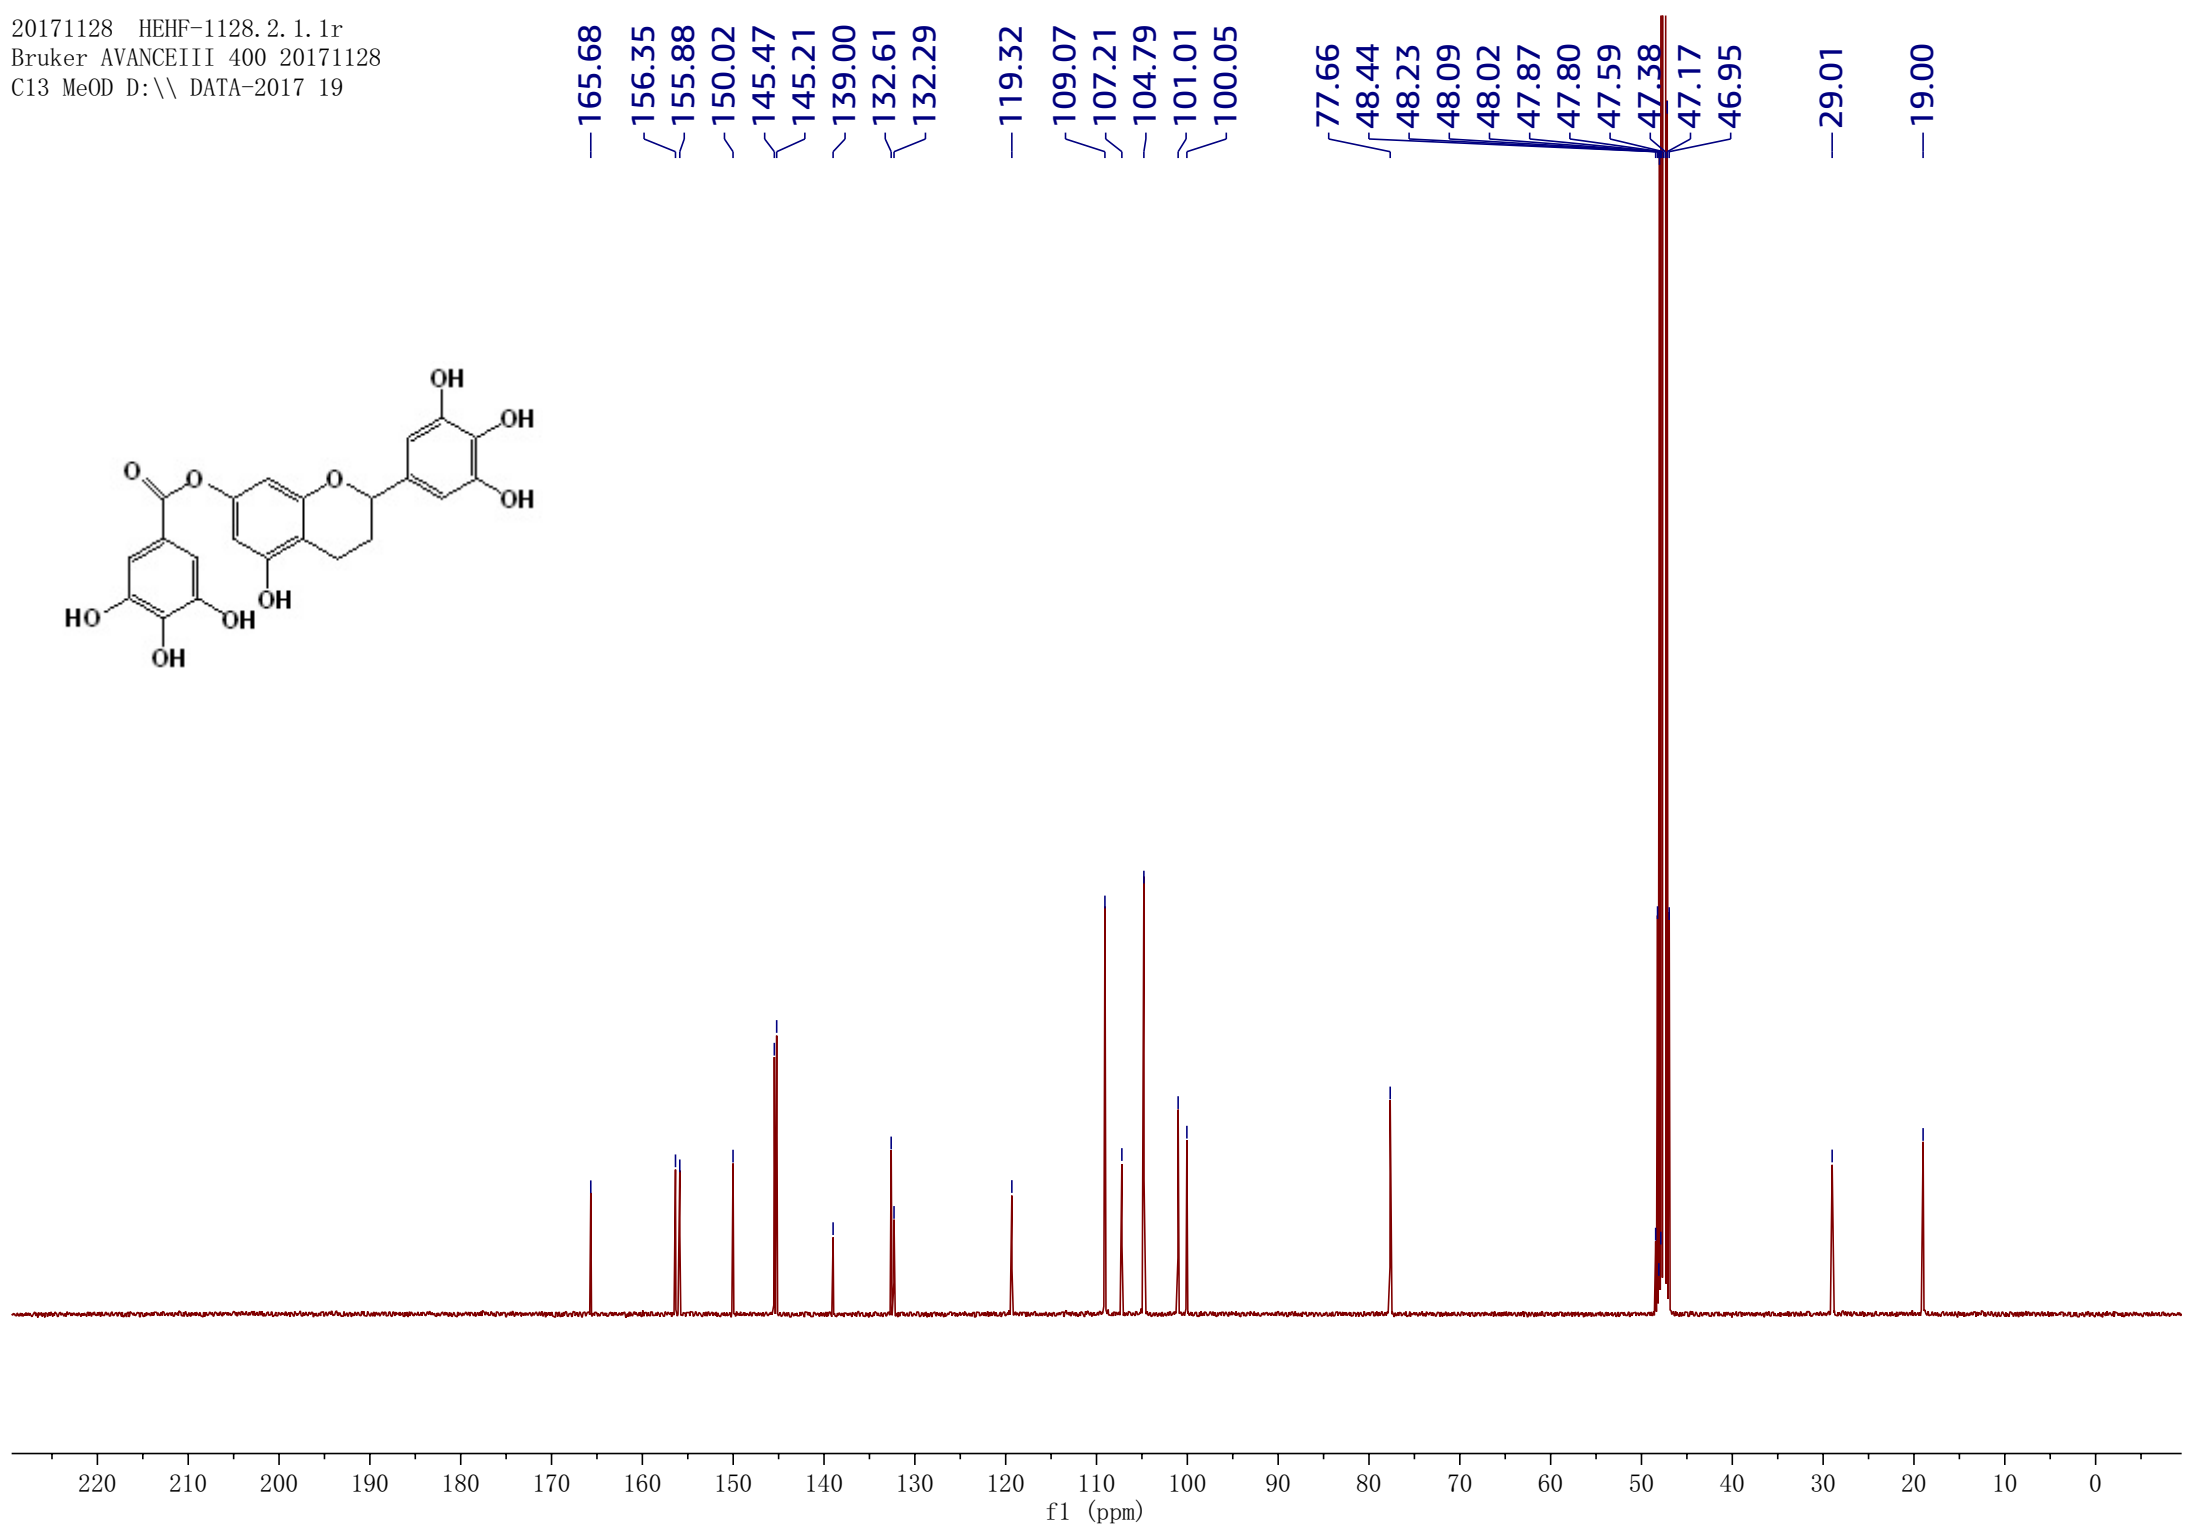

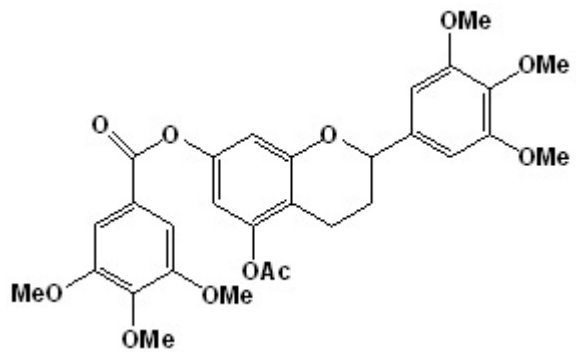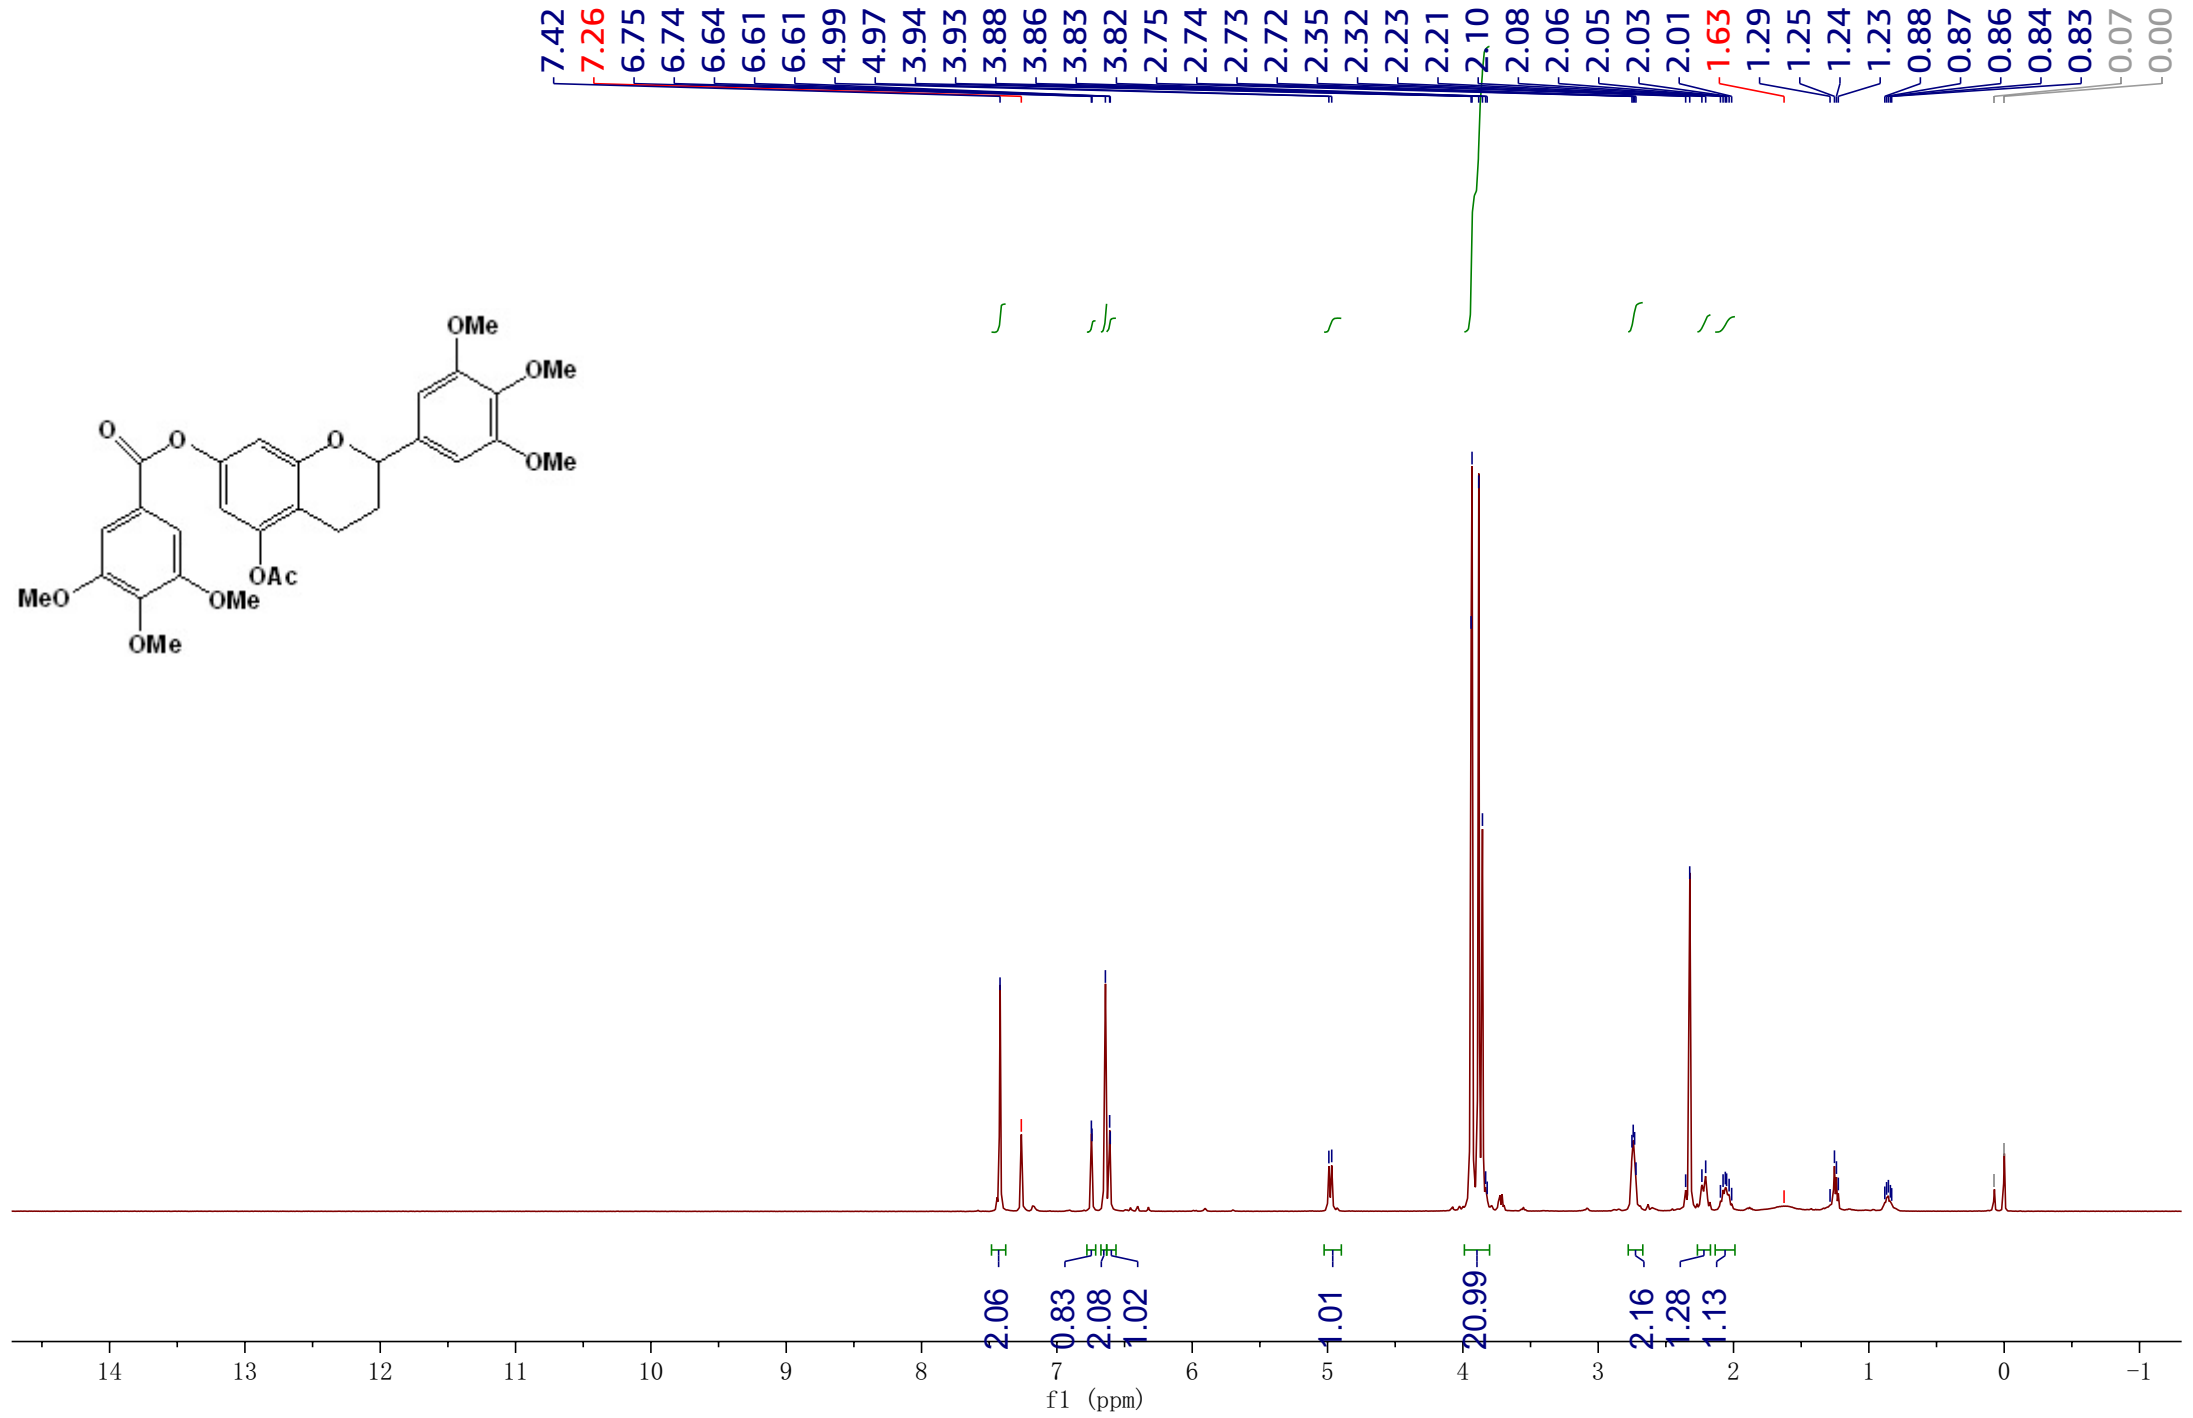

168.81  
164.54  
156.43  
153.45  
153.08  
149.69  
149.49  
142.87  
137.75  
136.66

124.19

112.99  
108.49  
108.13  
107.44  
103.09

78.24  
78.05  
77.38 CDC13  
77.26  
77.06 CDC13  
76.74 CDC13

61.02  
60.88  
56.36  
56.20  
56.19

29.21  
20.82  
20.10

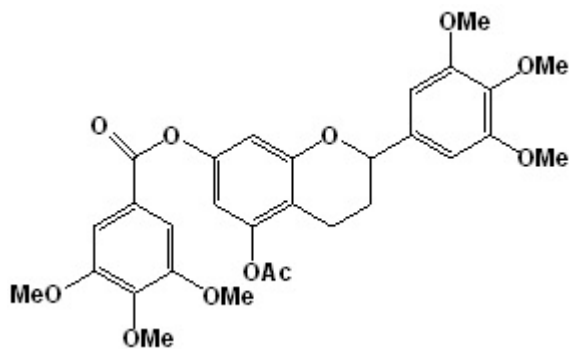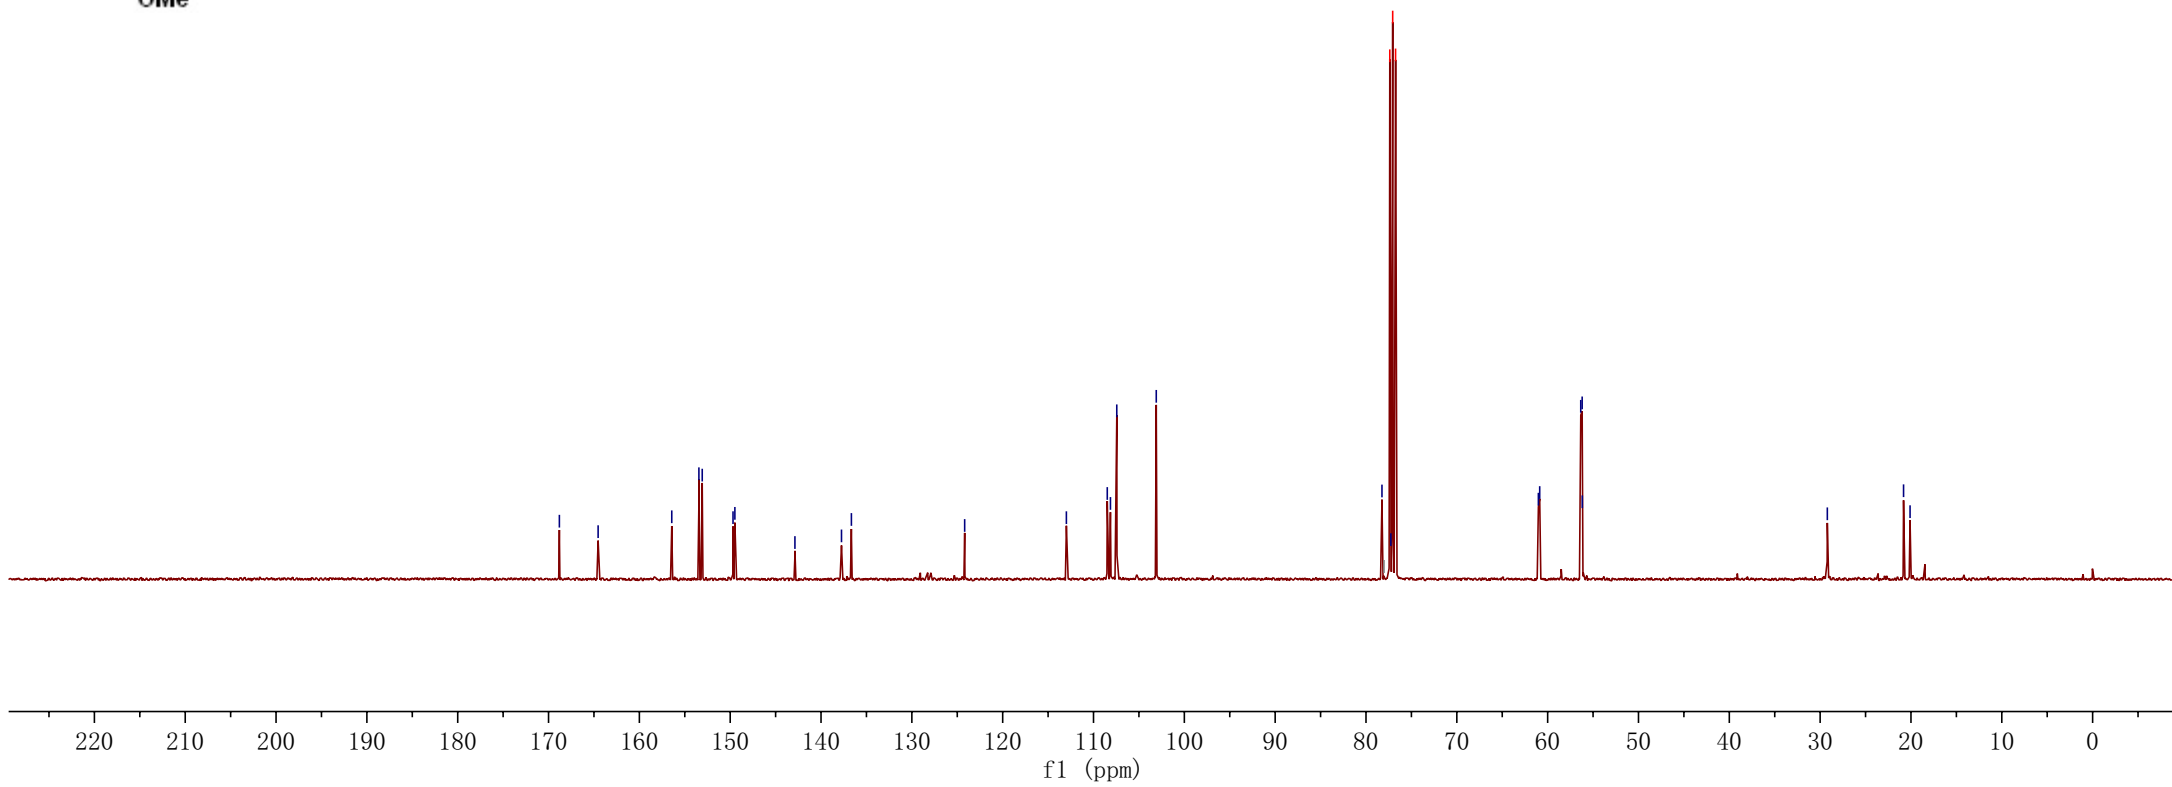

7.45  
7.43  
7.43  
7.41  
7.40  
7.38  
7.37  
7.35  
7.34  
**7.30 CDCl3**  
6.77  
6.76  
6.66  
6.63  
6.62  
4.98  
4.96  
3.98  
3.97  
3.91  
3.89  
3.88  
3.85  
3.78  
3.77  
3.75  
3.74  
2.61  
2.59  
2.58  
2.57  
2.55  
2.40  
2.19  
2.17  
2.16  
2.15  
2.06  
2.06  
2.05  
2.04  
2.02  
2.02  
2.01  
2.00  
2.00  
1.98  
**-1.64 H2O**  
1.30  
1.28  
1.27  
0.12  
0.04

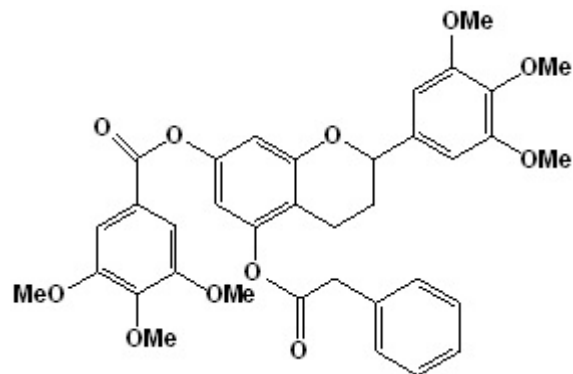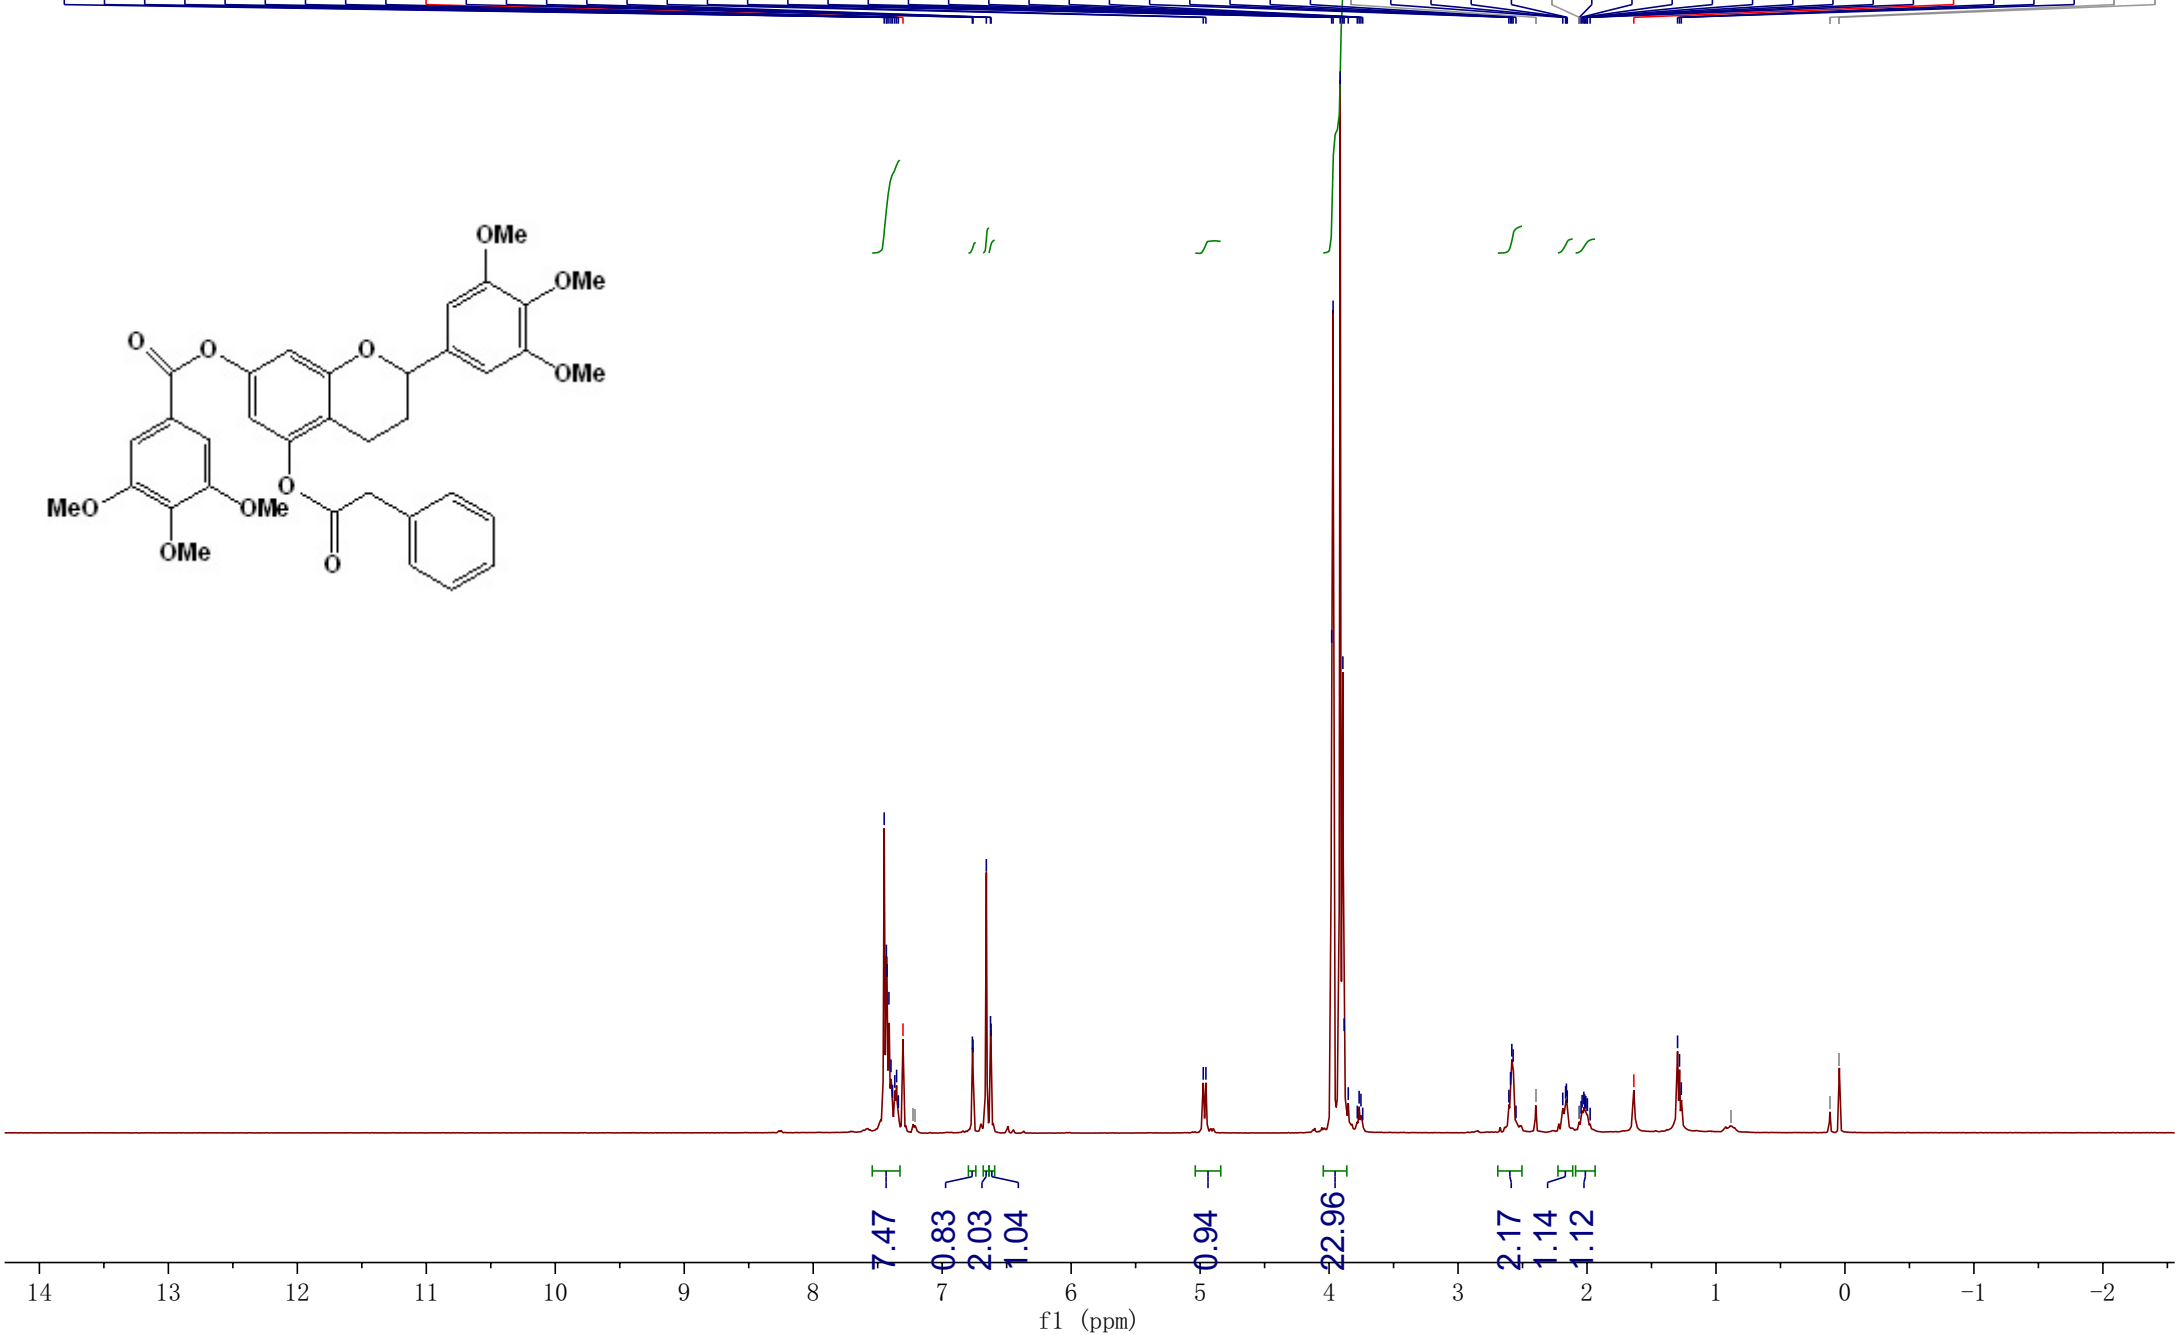

20171106 HEHF-BYX. 1. 1. 1r  
Bruker AVANCEIII 400 20171106  
C13 CDC13 D:\\ DATA-2017 20

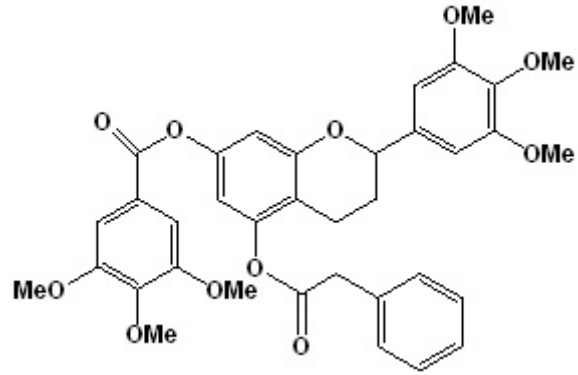

169.30  
164.55  
156.40  
153.43  
153.07  
149.63  
149.43  
142.87  
137.72  
136.63  
133.30  
129.39  
128.81  
128.80  
127.55  
124.16  
113.03  
108.54  
108.05  
107.43  
103.06

78.19  
77.38 CDC13  
77.27  
77.07 CDC13  
76.75 CDC13  
61.02  
60.87  
56.35  
56.19

-41.42

-29.17

-19.88

-0.03

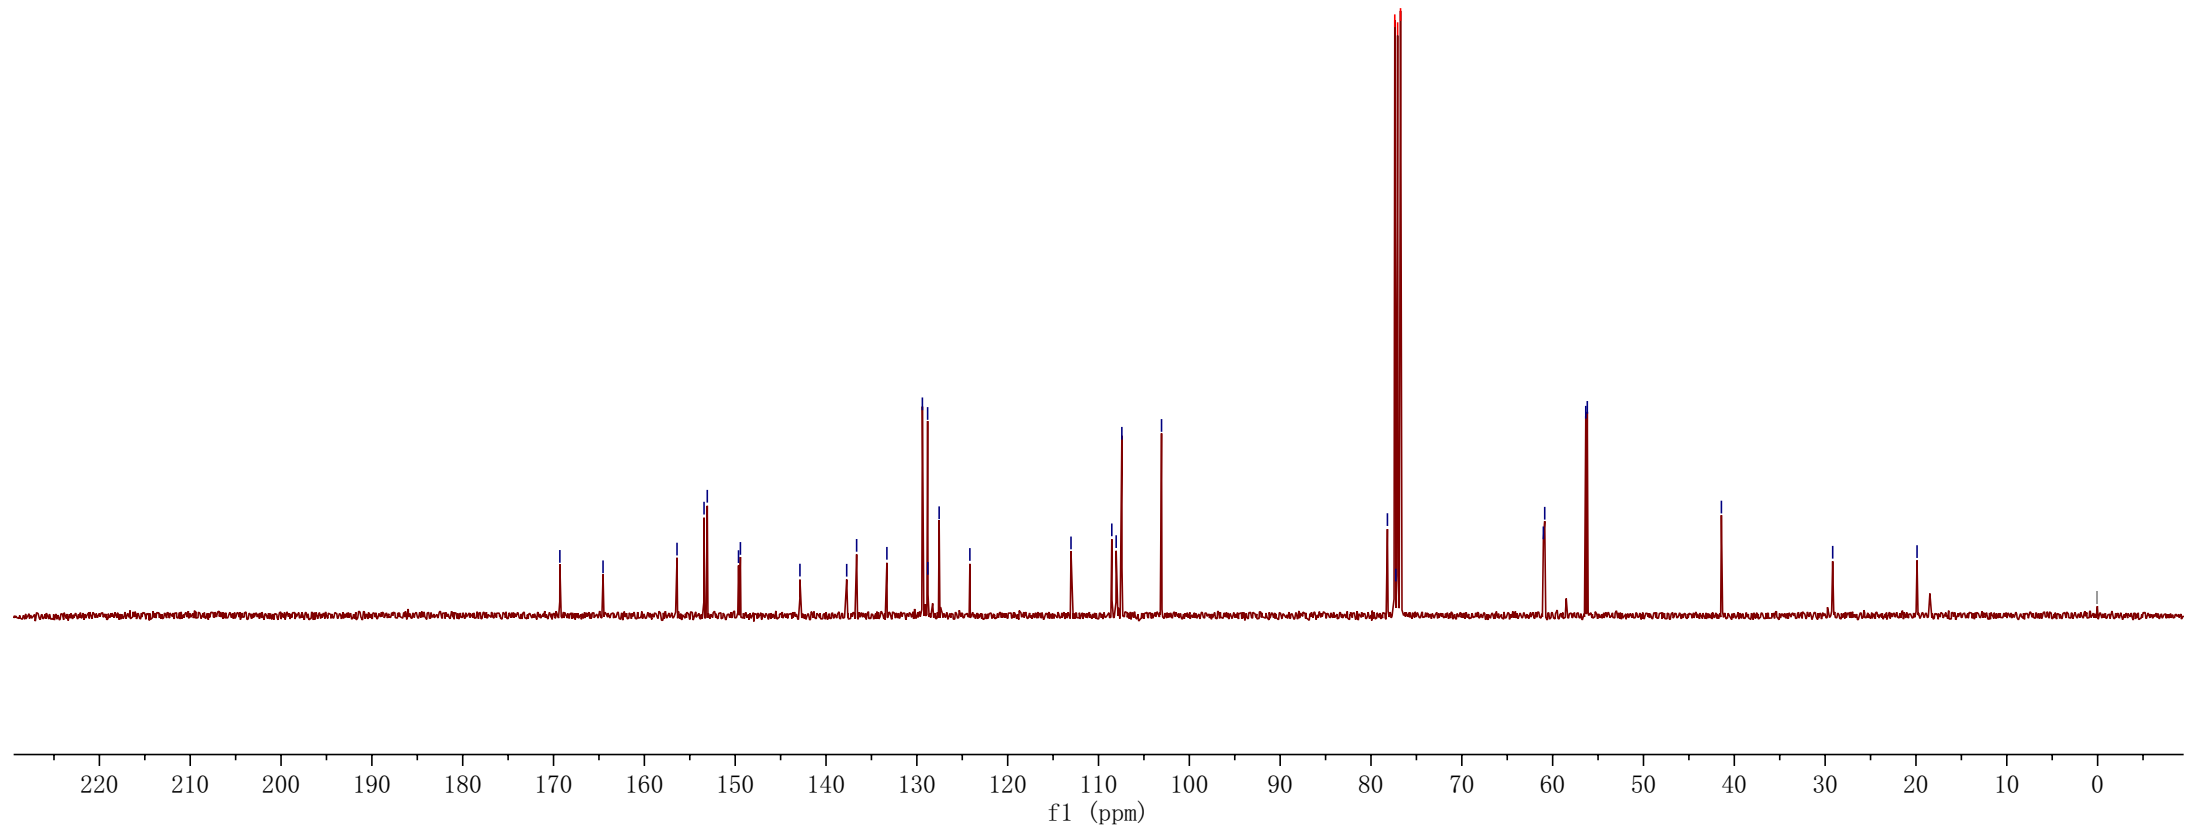

Supplement: c8ra01606b1.pdf [file c8ra01606b1.pdf]
